# Supplementary material for: An Oligomeric Sulfated Hyaluronan and Silk-Elastinlike Polymer Combination Protects against Murine Radiation Induced Proctitis
Source: MDPI journal article supplement (doi:10.3390/pharmaceutics14010175), 2022-01-12
Supplement: s1 [file s1]

# Supplementary Materials: An Oligomeric Sulfated Hyaluronan and Silk-Elastinlike Polymer Combination Protects against Murine Radiation Induced Proctitis

Douglas Steinhauff, Mark Martin Jensen , Ethan Griswold, Jolanta Jedrzkiewicz, Joseph Cappello, Siam Oottamasathien and Hamidreza Ghandehari

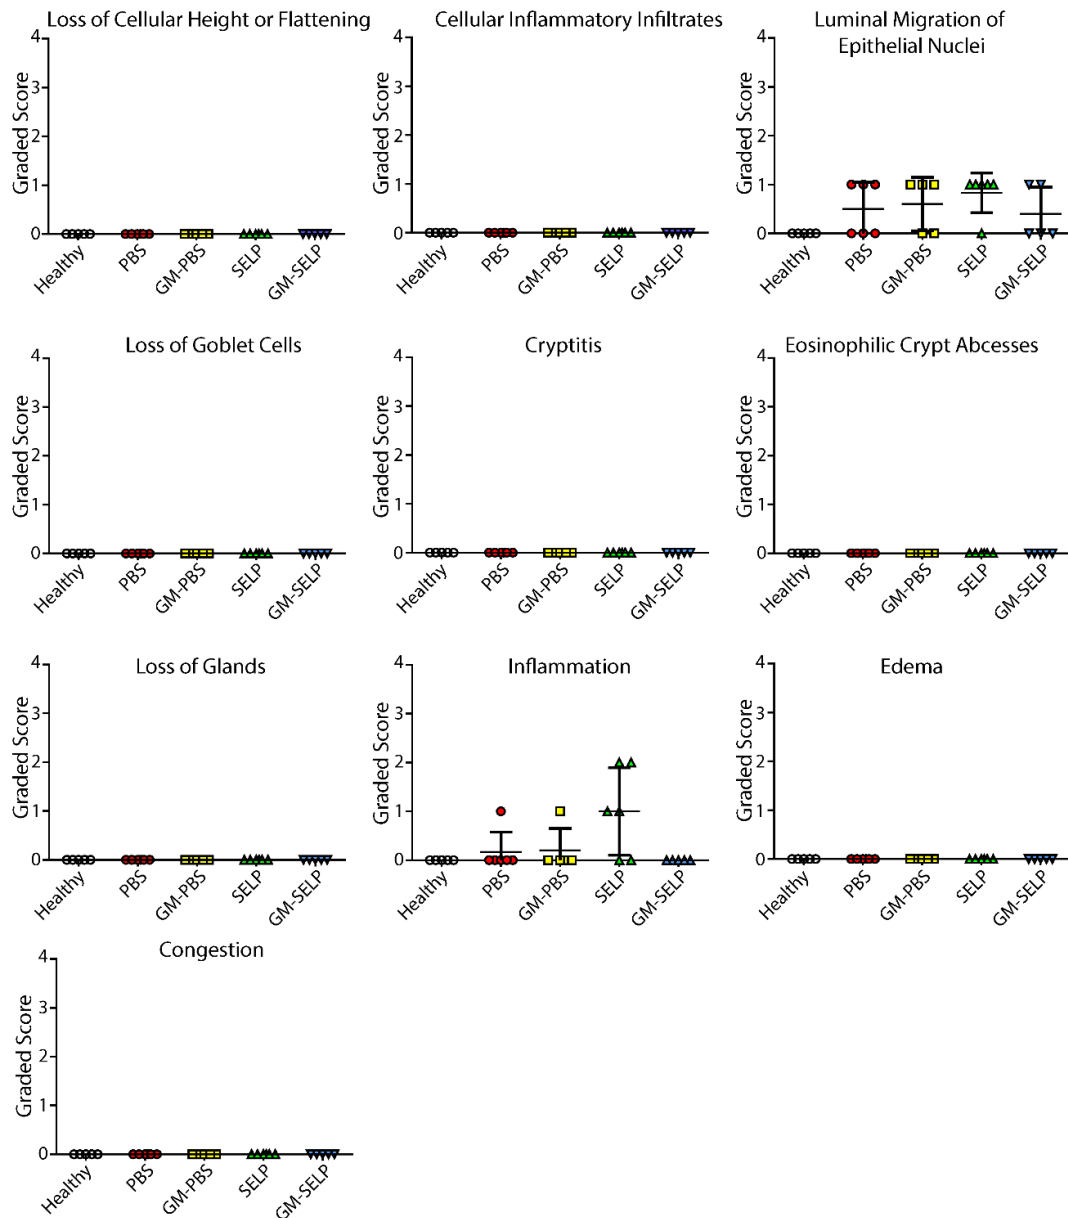

**Supplementary Figure S1:** Scoring of histological observations 3 days after treatment and irradiation. Scoring was performed in a blinded manner.

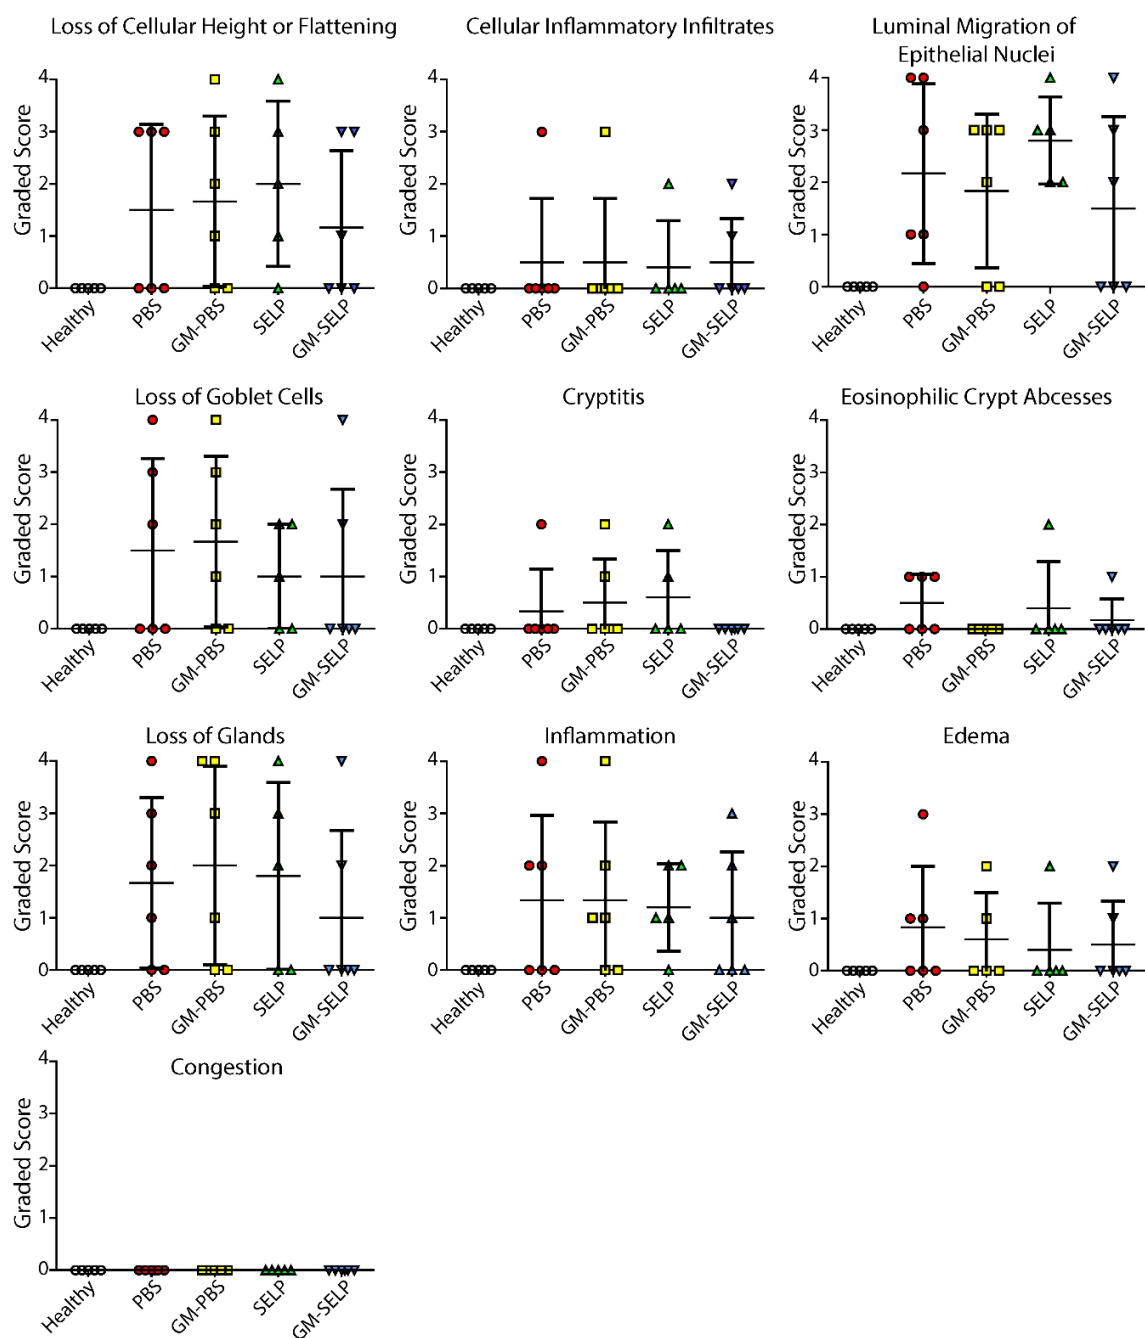

**Supplementary Figure S2:** Scoring of histological observations at the time of sacrifice for mice receiving treatment and irradiation. Scoring was performed in a blinded manner.
