# Supplementary material for: An Oligomeric Sulfated Hyaluronan and Silk-Elastinlike Polymer Combination Protects against Murine Radiation Induced Proctitis
Source: Pharmaceutics. 2022 Jan 12;14(1):175. doi: 10.3390/pharmaceutics14010175 (PMC8777937; doi:10.3390/pharmaceutics14010175)
Supplement: Supplementary file 1 [file pharmaceutics-14-00175-s001.zip › Supplemental Tables.xlsx]

## Sheet: DEGs
© 2000-2021 QIAGEN. All rights reserved.
	Supplementary table S1. Differntail gene expression between mice receiving GM-SELP +radiation and mice receiving radiation only.
	ID	Symbol	Expr Intensity/RPKM/FPKM/Counts	Expr Log Ratio	Expr p-value
	ENSMUSG00000105526	Gm43490	2.89383	-1.84956	0.0106746
	ENSMUSG00000000617	GRM6	14.1813	-1.60133	0.0207616
	ENSMUSG00000116368	Cyp2d33-ps	8.92752	-1.50573	0.0110952
	ENSMUSG00000108035	Gm44021	10.205	-1.48466	0.0104589
	ENSMUSG00000079186	Gzmc	4.19472	-1.46342	0.0665502
	ENSMUSG00000053044	CD8B	8.54941	-1.42889	0.0403671
	ENSMUSG00000094377	Gm24407	131.5	-1.37363	0.0403671
	ENSMUSG00000098197	BC051537	8.15631	-1.37052	0.0556832
	ENSMUSG00000108955	Gm44775	8.7528	-1.35919	0.0403671
	ENSMUSG00000113502	AC158115.1	7.20393	-1.3581	0.0676904
	ENSMUSG00000118294	Gm9028	7.82276	-1.35591	0.0518102
	ENSMUSG00000038357	CAMP	4.83904	-1.35587	0.0676904
	ENSMUSG00000096243	Gm24265	136.979	-1.30669	0.0498478
	ENSMUSG00000076939	Iglv3	28.3821	-1.27866	0.0255133
	ENSMUSG00000077578	Gm25631	5.34378	-1.27473	0.0736279
	ENSMUSG00000043931	GIMAP7	55.7612	-1.26975	0.0323591
	ENSMUSG00000049362	OR5K1	5.7542	-1.26829	0.0869451
	ENSMUSG00000104925	Gm43061	8.44315	-1.25773	0.0676904
	ENSMUSG00000100291	2310069B03Rik	132.986	-1.24061	0.0714268
	ENSMUSG00000036853	MCOLN3	8.30836	-1.23417	0.0954511
	ENSMUSG00000101414	Gm29101	8.34971	-1.23308	0.0954511
	ENSMUSG00000106024	A530083M17Rik	7.6777	-1.22664	0.0853539
	ENSMUSG00000039691	TSPAN10	6.82141	-1.21772	0.0702845
	ENSMUSG00000043168	4930426D05Rik	33.1832	-1.21475	0.0560683
	ENSMUSG00000084796	Mir142hg	118.611	-1.21279	0.0556832
	ENSMUSG00000005465	IL27RA	59.3522	-1.19138	0.0481598
	ENSMUSG00000076615	Ighg3	39.6983	-1.18528	0.0821536
	ENSMUSG00000020279	IL9R	50.0694	-1.18402	0.0676904
	ENSMUSG00000001588	ACAP1	509.17	-1.17616	0.0626809
	ENSMUSG00000106443	Gm42702	7.7056	-1.16529	0.0954511
	ENSMUSG00000076490	Trbc1	46.1518	-1.15766	0.00528059
	ENSMUSG00000094872	Igkv9-120	8.65158	-1.13853	0.0821536
	ENSMUSG00000115647	AC107453.4	12.498	-1.1378	0.0954511
	ENSMUSG00000036634	MAG	12.7018	-1.13585	0.0676904
	ENSMUSG00000108169	Gm43958	26.0051	-1.13041	0.0690144
	ENSMUSG00000041247	LAMP3	9.13697	-1.1258	0.0954511
	ENSMUSG00000024670	CD6	13.9869	-1.12369	0.0714268
	ENSMUSG00000081297	Gm12209	37.4389	-1.12146	0.0676904
	ENSMUSG00000037944	CCR7	65.3025	-1.11978	0.0736279
	ENSMUSG00000029380	CXCL2	51.9085	-1.11178	0.0481598
	ENSMUSG00000051682	Treml4	17.878	-1.10875	0.0176032
	ENSMUSG00000109162	2900027M19Rik	6.58118	-1.10744	0.0978916
	ENSMUSG00000102326	Gm37788	19.4921	-1.09914	0.0628385
	ENSMUSG00000031390	AVPR2	22.8915	-1.09835	0.0628385
	ENSMUSG00000048031	FCRL5	15.0548	-1.09656	0.0954511
	ENSMUSG00000110529	RP23-314A15.5	9.0682	-1.0959	0.0671538
	ENSMUSG00000022491	Glycam1	220.111	-1.08578	0.0724627
	ENSMUSG00000096349	Gm22513	41.6579	-1.08275	0.0954511
	ENSMUSG00000097352	C920009B18Rik	15.1344	-1.08112	0.0556832
	ENSMUSG00000105547	Iglc3	194.305	-1.0805	0.0560683
	ENSMUSG00000095616	Gm26244	37.689	-1.07642	0.0664081
	ENSMUSG00000052142	RASAL3	253.77	-1.07509	0.0954511
	ENSMUSG00000040592	CD79B	489.637	-1.06913	0.0954511
	ENSMUSG00000031304	IL2RG	208.833	-1.03323	0.0501009
	ENSMUSG00000095630	Igkv6-23	17.4719	-1.03181	0.0869451
	ENSMUSG00000102562	Gm37694	22.6735	-1.02756	0.0954511
	ENSMUSG00000023078	CXCL13	841.844	-1.02746	0.0950024
	ENSMUSG00000046793	GPR61	18.3616	-1.02236	0.0676904
	ENSMUSG00000115497	AC131033.1	19.0668	-1.02173	0.0954511
	ENSMUSG00000050357	CARMIL2	178.82	-1.01908	0.071053
	ENSMUSG00000020722	CACNG1	12.2354	-1.01858	0.0897049
	ENSMUSG00000037548	HLA-DMB	454.244	-1.01481	0.0796176
	ENSMUSG00000097146	Gm4211	8.2106	-1.01479	0.0954511
	ENSMUSG00000090214	Gm15657	80.3923	-1.01429	0.0104589
	ENSMUSG00000041202	PLA2G2D	126.897	-1.01133	0.066741
	ENSMUSG00000019874	FABP7	28.3041	-1.01065	0.0736279
	ENSMUSG00000115381	AC102847.2	48.6006	-1.0012	0.0665502
	ENSMUSG00000022416	CACNA1I	44.3468	-0.99815	0.0954511
	ENSMUSG00000035697	ARHGAP45	827.657	-0.995974	0.0950024
	ENSMUSG00000050100	HMX2	28.4663	-0.994195	0.0869451
	ENSMUSG00000087361	0610043K17Rik	15.0675	-0.983252	0.0900058
	ENSMUSG00000076937	Iglc2	246.871	-0.983234	0.0983267
	ENSMUSG00000010142	TNFRSF13B	115.328	-0.981834	0.0954511
	ENSMUSG00000114842	AC173482.5	11.1062	-0.980847	0.0954511
	ENSMUSG00000021880	RNASE6	83.6879	-0.975869	0.0690144
	ENSMUSG00000040061	PLCB2	114.898	-0.972814	0.0403671
	ENSMUSG00000087480	Gm15910	41.7284	-0.970951	0.0323591
	ENSMUSG00000008318	RELT	61.1159	-0.966755	0.0690144
	ENSMUSG00000028492	SAXO1	39.1029	-0.95846	0.0653744
	ENSMUSG00000000682	Cd52	589.119	-0.953562	0.0940377
	ENSMUSG00000052336	CX3CR1	240.387	-0.946986	0.0431685
	ENSMUSG00000108912	E230020D15Rik	41.2057	-0.932903	0.0954511
	ENSMUSG00000035042	CCL5	20.407	-0.93029	0.0954511
	ENSMUSG00000004837	GRAP	190.009	-0.927028	0.0766034
	ENSMUSG00000104724	Gm43162	48.7249	-0.917545	0.0954511
	ENSMUSG00000023274	CD4	80.4307	-0.915259	0.081407
	ENSMUSG00000035095	FAM167A	48.0528	-0.913222	0.0647405
	ENSMUSG00000114246	AC102542.1	23.0577	-0.90183	0.0900058
	ENSMUSG00000031506	PTPN7	93.6327	-0.900156	0.0983267
	ENSMUSG00000038147	CD84	147.758	-0.89929	0.0797057
	ENSMUSG00000109555	Gm44891	110.912	-0.897894	0.0900058
	ENSMUSG00000018654	IKZF1	180.29	-0.889825	0.0954511
	ENSMUSG00000031389	ARHGAP4	540.878	-0.886143	0.0633883
	ENSMUSG00000030149	Klrk1	18.8685	-0.884196	0.0664768
	ENSMUSG00000057058	SKAP1	44.1608	-0.883681	0.0954511
	ENSMUSG00000030830	ITGAL	152.853	-0.880111	0.0954511
	ENSMUSG00000060586	HLA-DRB5	2990.05	-0.878727	0.0844845
	ENSMUSG00000036526	CARD11	185.962	-0.872894	0.0736279
	ENSMUSG00000001741	IL16	170.857	-0.855412	0.0954511
	ENSMUSG00000020651	SLC26A4	23.9834	-0.85338	0.0950024
	ENSMUSG00000022488	NCKAP1L	344.244	-0.846981	0.0869451
	ENSMUSG00000034041	LYL1	177.314	-0.837347	0.0954511
	ENSMUSG00000020159	GABRP	40.3105	-0.829802	0.0897049
	ENSMUSG00000022831	HCLS1	322.875	-0.825708	0.0950024
	ENSMUSG00000036322	HLA-DRA	1341.19	-0.823643	0.0888514
	ENSMUSG00000024696	LPXN	111.782	-0.822555	0.0957057
	ENSMUSG00000015396	CD83	268.554	-0.814469	0.0110952
	ENSMUSG00000034786	GPSM3	151.538	-0.81189	0.0878721
	ENSMUSG00000021123	RDH12	36.6099	-0.808477	0.0954511
	ENSMUSG00000028581	LAPTM5	566.113	-0.807304	0.074689
	ENSMUSG00000102037	BCL2A1	52.1479	-0.806672	0.0954511
	ENSMUSG00000100215	Gm8292	44.6659	-0.805249	0.0983267
	ENSMUSG00000003283	HCK	126.6	-0.80266	0.0255133
	ENSMUSG00000071714	CSF2RB	151.477	-0.785145	0.0736279
	ENSMUSG00000060550	HLA-A	301.513	-0.785017	0.0954511
	ENSMUSG00000040751	LAT2	74.6033	-0.77578	0.0994825
	ENSMUSG00000090019	GIMAP1	217.058	-0.772787	0.0668589
	ENSMUSG00000107120	Gm43059	29.3353	-0.767518	0.0869451
	ENSMUSG00000048895	CDK5R1	118.348	-0.743726	0.0808573
	ENSMUSG00000107336	Gm43461	37.9135	-0.69663	0.0954511
	ENSMUSG00000096950	Gm9530	61.0796	-0.6945	0.0714308
	ENSMUSG00000021998	LCP1	1041.43	-0.674344	0.0954511
	ENSMUSG00000070000	FCHO1	232.486	-0.658104	0.0736279
	ENSMUSG00000004266	PTPN6	1296.18	-0.638747	0.0628385
	ENSMUSG00000069516	LYZ	4599.94	-0.612653	0.0736279
	ENSMUSG00000021025	NFKBIA	3019.11	-0.596943	0.0954511
	ENSMUSG00000116940	Gm7450	150.559	-0.582458	0.0556832
	ENSMUSG00000105176	Gm43668	86.816	-0.579038	0.0954511
	ENSMUSG00000104649	Gm43712	53.2152	-0.578333	0.0954511
	ENSMUSG00000024621	CSF1R	416.326	-0.573293	0.0255133
	ENSMUSG00000012126	UBXN11	119.346	-0.569152	0.0735374
	ENSMUSG00000036905	C1QB	406.028	-0.558822	0.0556832
	ENSMUSG00000097415	AU020206	989.149	-0.550677	0.0954511
	ENSMUSG00000051124	Gimap9	234.402	-0.550207	0.0954511
	ENSMUSG00000047767	ATG16L2	461.685	-0.544796	0.0403671
	ENSMUSG00000022020	NAA16	526.372	-0.544074	0.0954511
	ENSMUSG00000083992	Gm11478	334.721	-0.504325	0.0664768
	ENSMUSG00000036908	UNC93B1	1489.26	-0.45992	0.0560683
	ENSMUSG00000013155	ENKD1	173.773	-0.408528	0.0994825
	ENSMUSG00000027220	SYT13	320.753	-0.407626	0.095794
	ENSMUSG00000031107	RBMX2	223.198	-0.405257	0.0954511
	ENSMUSG00000033099	NOL12	748.638	-0.342661	0.0844845
	ENSMUSG00000056708	IER5	1255	-0.339707	0.0724627
	ENSMUSG00000021431	SNRNP48	1883.47	-0.322077	0.0798327
	ENSMUSG00000040128	PNRC1	2850.96	-0.293805	0.0954511
	ENSMUSG00000022760	THAP7	412.826	-0.261488	0.0490977
	ENSMUSG00000035278	PLEKHJ1	1375.04	-0.215648	0.0592435
	ENSMUSG00000071072	PTGES3	3263.1	-0.15761	0.0961194
	ENSMUSG00000004789	DLST	4881.41	0.167703	0.0798327
	ENSMUSG00000015095	FBXW5	1189.31	0.178812	0.0954511
	ENSMUSG00000042626	SHC1	1827.77	0.183213	0.0954511
	ENSMUSG00000026626	PPP2R5A	3820.15	0.19256	0.0664081
	ENSMUSG00000002546	GOLGA2	2200.88	0.21024	0.0697665
	ENSMUSG00000003233	DVL3	1464.37	0.237935	0.0664081
	ENSMUSG00000039318	RAB3GAP2	1023.63	0.250084	0.0983267
	ENSMUSG00000022770	DLG1	2092.71	0.252774	0.0104589
	ENSMUSG00000028868	WASF2	2642.68	0.259188	0.0897049
	ENSMUSG00000021748	PDHB	3055.74	0.262325	0.0983267
	ENSMUSG00000030421	URI1	1243.9	0.262837	0.0954511
	ENSMUSG00000001761	SMO	753.843	0.263239	0.0676904
	ENSMUSG00000024759	ATL3	2564.35	0.273089	0.0954511
	ENSMUSG00000020456	OGDH	8031.94	0.273143	0.0954511
	ENSMUSG00000045767	C5orf24	1524.2	0.283475	0.0954511
	ENSMUSG00000043391	C3orf70	783.641	0.28378	0.0690144
	ENSMUSG00000043061	Tmem18	539.059	0.287457	0.0954511
	ENSMUSG00000024887	ASAH2	399.878	0.287781	0.0676904
	ENSMUSG00000038949	CNST	1638.6	0.290621	0.0668589
	ENSMUSG00000020883	FBXL20	1291.44	0.293078	0.0954511
	ENSMUSG00000022297	FZD6	423.648	0.296397	0.0664768
	ENSMUSG00000014956	PPP1CB	8918.72	0.297371	0.0954511
	ENSMUSG00000031865	DCTN1	3085.27	0.30607	0.0950024
	ENSMUSG00000025968	NDUFS1	2799.3	0.31194	0.0668589
	ENSMUSG00000041842	FHDC1	585.347	0.313393	0.0323591
	ENSMUSG00000041935	C5orf51	1525.85	0.319162	0.0664081
	ENSMUSG00000024143	RHOQ	1141.15	0.329762	0.0676904
	ENSMUSG00000039461	TCTA	932.338	0.330357	0.0883105
	ENSMUSG00000031299	PDHA1	6208.74	0.333588	0.0813891
	ENSMUSG00000039414	HEATR5B	497.705	0.33965	0.0668589
	ENSMUSG00000028082	SH3D19	4309.35	0.342408	0.0897049
	ENSMUSG00000025241	FYCO1	937.891	0.343444	0.0106746
	ENSMUSG00000042350	AREL1	817.222	0.354185	0.0690144
	ENSMUSG00000035064	EEF2K	3599.35	0.354884	0.0665502
	ENSMUSG00000032411	TFDP2	931.989	0.355257	0.0664768
	ENSMUSG00000041037	IRGQ	570.919	0.356689	0.0631481
	ENSMUSG00000039789	ZNF597	315.576	0.362718	0.0498478
	ENSMUSG00000034109	GOLIM4	1668.91	0.362738	0.0490977
	ENSMUSG00000018931	NATD1	252.219	0.363259	0.0736279
	ENSMUSG00000031714	GAB1	659.666	0.367185	0.0403671
	ENSMUSG00000062098	BTBD3	578.157	0.372906	0.0676904
	ENSMUSG00000025745	HADHA	5152.54	0.392377	0.0950024
	ENSMUSG00000037949	ANO10	1295.68	0.401271	0.0668589
	ENSMUSG00000019899	LAMA2	222.801	0.407707	0.0664081
	ENSMUSG00000032202	RAB27A	1029.51	0.410581	0.0950024
	ENSMUSG00000095362	ZNF442	124.249	0.420329	0.0954511
	ENSMUSG00000041961	ZNRF3	315.555	0.42079	0.0869451
	ENSMUSG00000039976	TBC1D16	397.8	0.422195	0.0127155
	ENSMUSG00000025509	PNPLA2	3279	0.443449	0.0954511
	ENSMUSG00000038167	PLEKHG6	1045.87	0.446388	0.0736279
	ENSMUSG00000062908	ACADM	4202.2	0.448114	0.0797057
	ENSMUSG00000068742	CRY2	919.905	0.449016	0.0676904
	ENSMUSG00000023806	RSPH3	221.596	0.461962	0.0664768
	ENSMUSG00000015659	SERAC1	188.648	0.46737	0.0676904
	ENSMUSG00000001983	TACO1	174.918	0.48437	0.0864377
	ENSMUSG00000033096	APMAP	1165.89	0.484951	0.0676904
	ENSMUSG00000091498	Mpc1-ps	164.052	0.488491	0.0869451
	ENSMUSG00000028680	PLK3	2168.43	0.494535	0.0797057
	ENSMUSG00000035284	VPS13C	636.799	0.497001	0.0957057
	ENSMUSG00000033059	PYGB	5718.16	0.497287	0.0323591
	ENSMUSG00000035376	HACD2	864.725	0.516147	0.0498478
	ENSMUSG00000071656	LRRN4CL	127.139	0.517559	0.0865318
	ENSMUSG00000028542	SLC6A9	200.832	0.52163	0.0954511
	ENSMUSG00000046541	ZNF526	127.184	0.52207	0.0628385
	ENSMUSG00000066571	GARRE1	199.552	0.532667	0.0676904
	ENSMUSG00000055730	Ces2a	1492.29	0.536099	0.0983267
	ENSMUSG00000064105	CNNM2	164.755	0.544795	0.0954511
	ENSMUSG00000037016	FREM2	362.652	0.555303	0.0954511
	ENSMUSG00000002996	HBP1	636.851	0.555805	0.0104589
	ENSMUSG00000021823	VCL	1991.94	0.562406	0.0983267
	ENSMUSG00000025262	FAM120C	90.2803	0.56493	0.0647405
	ENSMUSG00000030616	SYTL2	1625.71	0.585417	0.0954511
	ENSMUSG00000022032	SCARA5	160.757	0.609791	0.0788781
	ENSMUSG00000005580	ADCY9	143.119	0.610068	0.0498478
	ENSMUSG00000027204	FBN1	1090.9	0.611626	0.0869451
	ENSMUSG00000027375	MAL	609.843	0.613323	0.0954511
	ENSMUSG00000040584	ABCB1	10475.6	0.613999	0.0869451
	ENSMUSG00000024327	SLC39A7	307.094	0.625511	0.0490977
	ENSMUSG00000022519	SRL	110.271	0.63093	0.050069
	ENSMUSG00000045281	GPR20	200.184	0.633558	0.0676904
	ENSMUSG00000027637	RAB5IF	653.797	0.640273	0.0736279
	ENSMUSG00000036492	RNF39	249.081	0.640645	0.0954511
	ENSMUSG00000082361	BTC	200.637	0.645408	0.081699
	ENSMUSG00000085830	Grin1os	59.4262	0.661266	0.0957057
	ENSMUSG00000039238	ZNF750	280.97	0.668514	0.0676904
	ENSMUSG00000036377	Cracd	1955.14	0.67871	0.0954511
	ENSMUSG00000041695	KCNJ2	98.9326	0.680007	0.0954511
	ENSMUSG00000087543	Gm16576	65.0338	0.68765	0.0954511
	ENSMUSG00000028246	FAXC	212.686	0.688601	0.0690144
	ENSMUSG00000003752	ITPKC	324.856	0.701345	0.0954511
	ENSMUSG00000054200	FFAR4	238.57	0.718196	0.0994825
	ENSMUSG00000033855	STON1	278.417	0.732997	0.0255133
	ENSMUSG00000047497	ADAMTS12	48.8476	0.781564	0.0892468
	ENSMUSG00000037106	FER1L6	1294.81	0.789934	0.0556832
	ENSMUSG00000117278	Gm36684	26.5503	0.799716	0.0954511
	ENSMUSG00000089704	GALNT2	35.1442	0.80876	0.0869451
	ENSMUSG00000034107	ANO7	700.548	0.818799	0.095794
	ENSMUSG00000085595	Gm16090	29.8938	0.898583	0.0869451
	ENSMUSG00000047730	FCGBP	43225.5	0.930168	0.0664768
	ENSMUSG00000031981	CAPN9	640.512	0.932611	0.0481598
	ENSMUSG00000032226	GCNT3	1456.16	0.935932	0.0556832
	ENSMUSG00000097852	4933405D12Rik	12.3431	0.939023	0.0954511
	ENSMUSG00000048652	Samd13	32.0036	0.958119	0.0403671
	ENSMUSG00000105456	Gm43745	148.283	0.96399	0.0684424
	ENSMUSG00000049350	ZG16	38482.3	0.999023	0.0481598
	ENSMUSG00000025515	MUC2	29997.5	1.0039	0.0676904
	ENSMUSG00000083907	Plk-ps1	11.81	1.00467	0.0957057
	ENSMUSG00000013523	BCAS1	2777.25	1.056	0.0490977
	ENSMUSG00000079105	C7	14.8201	1.0612	0.0794435
	ENSMUSG00000079645	Gm17193	18.6798	1.09445	0.0664768
	ENSMUSG00000107215	Gm43197	19.4543	1.11805	0.0676904
	ENSMUSG00000052305	HBB	404.719	1.14673	0.0556832
	ENSMUSG00000028255	CLCA1	56226.4	1.18684	0.0403671
	ENSMUSG00000112902	RP23-193A14.3	2.87586	1.23752	0.0954511
	ENSMUSG00000069917	HBA1/HBA2	84.4931	1.36939	0.0110952

## Sheet: Canonical Pathways
© 2000-2021 QIAGEN. All rights reserved.
	Supplementary Table S2. Significant canonical pathways identified using DEGs (Supplemnetary Table 1) using casual analysis.
	Ingenuity Canonical Pathways	-log(p-value)	Ratio	z-score	Molecules
	PKCθ Signaling in T Lymphocytes	1.65	0.0179	-2.646	CACNA1I,CACNG1,CARD11,CD4,HLA-A,HLA-DMB,HLA-DRA,HLA-DRB5,NFKBIA,Trbc1
	Crosstalk between Dendritic Cells and Natural Killer Cells	5.94	0.0879	-2.449	CCR7,CD83,CSF2RB,HLA-A,HLA-DRA,HLA-DRB5,IL2RG,ITGAL
	Th1 Pathway	3.19	0.0492	-2.449	CD4,HLA-A,HLA-DMB,HLA-DRA,HLA-DRB5,IL27RA
	Synaptic Long Term Depression	2.84	0.0361	-2.449	CACNA1I,CACNG1,GRM6,PLA2G2D,PLCB2,PPP2R5A,SLC39A7
	PD-1, PD-L1 cancer immunotherapy pathway	2.66	0.0472	2.236	HLA-A,HLA-DMB,HLA-DRA,HLA-DRB5,IL2RG
	Senescence Pathway	1.37	0.0202	2.236	CACNG1,CAPN9,HBP1,PDHA1,PDHB,PPP2R5A
	Neuroinflammation Signaling Pathway	2.79	0.0286	-2.121	CCL5,CSF1R,CX3CR1,GABRP,HLA-A,HLA-DMB,HLA-DRA,HLA-DRB5,PLA2G2D
	Corticotropin Releasing Hormone Signaling	2.03	0.0336	2	ADCY9,CACNA1I,CACNG1,SLC39A7,SMO
	Antioxidant Action of Vitamin C	1.82	0.036	2	CSF2RB,NFKBIA,PLA2G2D,PLCB2
	Insulin Receptor Signaling	1.49	0.0286	2	GAB1,PPP1CB,RHOQ,SHC1
	Endocannabinoid Neuronal Synapse Pathway	1.42	0.0272	-2	ADCY9,CACNA1I,CACNG1,PLCB2
	T Cell Receptor Signaling	2.6	0.0212	-1.941	CARD11,CD4,CD8B,HLA-A,HLA-DMB,HLA-DRA,HLA-DRB5,ITGAL,NFKBIA,PTPN6,PTPN7,SKAP1,Trbc1
	ICOS-ICOSL Signaling in T Helper Cells	1.51	0.0178	-1.89	CD4,HLA-A,HLA-DMB,HLA-DRA,HLA-DRB5,IL2RG,NFKBIA,SHC1,Trbc1
	p70S6K Signaling	3.01	0.0455	-1.633	CD79B,EEF2K,IL2RG,PLCB2,PPP2R5A,SHC1
	Erythropoietin Signaling Pathway	2.37	0.0339	1.633	CSF2RB,HBA1/HBA2,HBB,NFKBIA,PTPN6,SHC1
	Production of Nitric Oxide and Reactive Oxygen Species in Macrophages	2.21	0.0314	-1.342	LYZ,NFKBIA,PPP1CB,PPP2R5A,PTPN6,RHOQ
	Integrin Signaling	1.99	0.0282	1.342	CAPN9,ITGAL,PPP1CB,RHOQ,SHC1,VCL
	Glioblastoma Multiforme Signaling	1.8	0.0292	1.342	FZD6,PLCB2,RHOQ,SHC1,SMO
	Hepatic Fibrosis Signaling Pathway	1.55	0.0191	1.342	CACNG1,CCL5,DVL3,FZD6,ITGAL,NFKBIA,RHOQ,SMO
	WNT/Ca+ pathway	2.65	0.0625	1	DVL3,FZD6,PLCB2,SMO
	GM-CSF Signaling	2.51	0.0571	-1	BCL2A1,CSF2RB,HCK,SHC1
	STAT3 Pathway	2.21	0.037	-1	CSF2RB,IL27RA,IL2RG,IL9R,PTPN6
	Actin Cytoskeleton Signaling	1.72	0.0245	1	ITGAL,NCKAP1L,PPP1CB,SHC1,VCL,WASF2
	White Adipose Tissue Browning Pathway	1.53	0.0294	-1	ADCY9,CACNA1I,CACNG1,CAMP
	ERK/MAPK Signaling	1.43	0.0234	-1	ITGAL,PLA2G2D,PPP1CB,PPP2R5A,SHC1
	Gustation Pathway	2.12	0.03	-0.816	ADCY9,CACNA1I,CACNG1,FFAR4,GABRP,PLCB2
	Phagosome Formation	2.59	0.0203	-0.535	AVPR2,CCR7,CX3CR1,FFAR4,FZD6,GPR20,GPR61,GRM6,HCK,ITGAL,PLA2G2D,SCARA5,SMO,WASF2
	GPCR-Mediated Nutrient Sensing in Enteroendocrine Cells	2.49	0.0431	-0.447	ADCY9,CACNA1I,CACNG1,FFAR4,PLCB2
	D-myo-inositol-5-phosphate Metabolism	2.2	0.0312	-0.447	HACD2,PLCB2,PPP1CB,PPP2R5A,PTPN6,PTPN7
	Insulin Secretion Signaling Pathway	2.07	0.0261	0.447	ADCY9,CACNA1I,CACNG1,HCK,PDHA1,PDHB,PLCB2
	Endothelin-1 Signaling	1.61	0.0262	-0.447	ADCY9,GAB1,PLA2G2D,PLCB2,SHC1
	Role of NFAT in Cardiac Hypertrophy	1.39	0.0227	-0.447	ADCY9,CACNA1I,CACNG1,PLCB2,SHC1
	Protein Kinase A Signaling	1.64	0.0199	0.378	ADCY9,NFKBIA,PLCB2,PPP1CB,PTPN6,PTPN7,PYGB,SMO
	Breast Cancer Regulation by Stathmin1	2.73	0.022	0.277	AVPR2,CCR7,CX3CR1,FFAR4,FZD6,GPR20,GPR61,GRM6,PLCB2,PPP1CB,PPP2R5A,SHC1,SMO
	CREB Signaling in Neurons	3.14	0.0233	0	ADCY9,AVPR2,CACNA1I,CACNG1,CCR7,CX3CR1,FFAR4,FZD6,GPR20,GPR61,GRM6,PLCB2,SHC1,SMO
	Cardiac Hypertrophy Signaling (Enhanced)	2.62	0.0223	0	ADCY9,CACNG1,CSF2RB,DLG1,DVL3,FZD6,IL27RA,IL2RG,IL9R,ITGAL,PLCB2,SMO
	CDK5 Signaling	2.55	0.0446	0	ADCY9,CDK5R1,LAMA2,PPP1CB,PPP2R5A
	Superpathway of Inositol Phosphate Compounds	2.4	0.0302	0	HACD2,ITPKC,PLCB2,PPP1CB,PPP2R5A,PTPN6,PTPN7
	Dopamine-DARPP32 Feedback in cAMP Signaling	2.32	0.0331	0	ADCY9,CACNG1,KCNJ2,PLCB2,PPP1CB,PPP2R5A
	B Cell Receptor Signaling	2.09	0.0191	0	BCL2A1,CD79B,GAB1,Ighg3,Igkv6-23,Igkv9-120,Iglc2,Iglc3,Iglv3,NFKBIA,PTPN6,SHC1
	D-myo-inositol (1,4,5,6)-Tetrakisphosphate Biosynthesis	1.75	0.0284	0	HACD2,PPP1CB,PPP2R5A,PTPN6,PTPN7
	D-myo-inositol (3,4,5,6)-tetrakisphosphate Biosynthesis	1.75	0.0284	0	HACD2,PPP1CB,PPP2R5A,PTPN6,PTPN7
	Systemic Lupus Erythematosus In B Cell Signaling Pathway	1.65	0.0166	0	CARD11,CD79B,GAB1,HCK,Ighg3,Igkv6-23,Igkv9-120,Iglc2,Iglc3,Iglv3,PTPN6,SHC1
	3-phosphoinositide Degradation	1.64	0.0266	0	HACD2,PPP1CB,PPP2R5A,PTPN6,PTPN7
	3-phosphoinositide Biosynthesis	1.52	0.0248	0	HACD2,PPP1CB,PPP2R5A,PTPN6,PTPN7
	Thrombin Signaling	1.46	0.0238	0	ADCY9,PLCB2,PPP1CB,RHOQ,SHC1
	IL-4 Signaling	4.81	0.0753	#NUM!	HLA-A,HLA-DMB,HLA-DRA,HLA-DRB5,IL2RG,PTPN6,SHC1
	B Cell Development	4.49	0.116	#NUM!	CD79B,HLA-A,HLA-DMB,HLA-DRA,HLA-DRB5
	PI3K/AKT Signaling	4.24	0.0452	#NUM!	CSF2RB,GAB1,IL27RA,IL2RG,IL9R,ITGAL,NFKBIA,PPP2R5A,SHC1
	Th1 and Th2 Activation Pathway	3.91	0.0465	#NUM!	CD4,HLA-A,HLA-DMB,HLA-DRA,HLA-DRB5,IKZF1,IL27RA,IL2RG
	Th2 Pathway	3.74	0.0511	#NUM!	CD4,HLA-A,HLA-DMB,HLA-DRA,HLA-DRB5,IKZF1,IL2RG
	Antigen Presentation Pathway	3.47	0.103	#NUM!	HLA-A,HLA-DMB,HLA-DRA,HLA-DRB5
	2-ketoglutarate Dehydrogenase Complex	3.36	0.5	#NUM!	DLST,OGDH
	Glucocorticoid Receptor Signaling	3.29	0.0241	#NUM!	CCL5,CSF2RB,HLA-A,HLA-DMB,HLA-DRA,HLA-DRB5,IL27RA,IL2RG,IL9R,NDUFS1,NFKBIA,PLA2G2D,PTGES3,SHC1
	Acetyl-CoA Biosynthesis I (Pyruvate Dehydrogenase Complex)	2.83	0.286	#NUM!	PDHA1,PDHB
	Communication between Innate and Adaptive Immune Cells	2.56	0.0183	#NUM!	CCL5,CCR7,CD4,CD79B,CD83,CD8B,HLA-A,HLA-DRA,HLA-DRB5,Ighg3,Igkv6-23,Igkv9-120,Iglc2,Iglc3,Iglv3,TNFRSF13B,Trbc1
	FcγRIIB Signaling in B Lymphocytes	2.21	0.0471	#NUM!	CACNA1I,CACNG1,CD79B,SHC1
	Primary Immunodeficiency Signaling	1.93	0.0545	#NUM!	CD4,IL2RG,TNFRSF13B
	Telomerase Signaling	1.87	0.0374	#NUM!	IL2RG,PPP2R5A,PTGES3,SHC1
	Molecular Mechanisms of Cancer	1.83	0.0202	#NUM!	ADCY9,FZD6,GAB1,ITGAL,NFKBIA,PLCB2,RHOQ,SHC1,SMO
	PCP (Planar Cell Polarity) Pathway	1.83	0.05	#NUM!	DVL3,FZD6,SMO
	TCA Cycle II (Eukaryotic)	1.75	0.0833	#NUM!	DLST,OGDH
	Neuregulin Signaling	1.74	0.0342	#NUM!	BTC,CDK5R1,ITGAL,SHC1
	Sphingosine-1-phosphate Signaling	1.73	0.0339	#NUM!	ADCY9,ASAH2,PLCB2,RHOQ
	Renin-Angiotensin Signaling	1.7	0.0333	#NUM!	ADCY9,CCL5,PTPN6,SHC1
	Role of NANOG in Mammalian Embryonic Stem Cell Pluripotency	1.7	0.0333	#NUM!	FZD6,GAB1,SHC1,SMO
	Role of JAK1 and JAK3 in γc Cytokine Signaling	1.67	0.0435	#NUM!	IL2RG,IL9R,SHC1
	Basal Cell Carcinoma Signaling	1.62	0.0417	#NUM!	DVL3,FZD6,SMO
	GABA Receptor Signaling	1.58	0.0305	#NUM!	ADCY9,CACNA1I,CACNG1,GABRP
	Role of MAPK Signaling in Inhibiting the Pathogenesis of Influenza	1.56	0.0395	#NUM!	CCL5,NFKBIA,PLA2G2D
	Dopamine Receptor Signaling	1.55	0.039	#NUM!	ADCY9,PPP1CB,PPP2R5A
	Role of WNT/GSK-3β Signaling in the Pathogenesis of Influenza	1.53	0.0385	#NUM!	DVL3,FZD6,SMO
	IL-3 Signaling	1.52	0.038	#NUM!	CSF2RB,PTPN6,SHC1
	Chemokine Signaling	1.5	0.0375	#NUM!	CCL5,PLCB2,PPP1CB
	G-Protein Coupled Receptor Signaling	1.5	0.0217	#NUM!	ADCY9,AVPR2,GRM6,NFKBIA,PLCB2,SHC1
	Role of JAK2 in Hormone-like Cytokine Signaling	1.47	0.0588	#NUM!	PTPN6,SHC1
	Fatty Acid β-oxidation I	1.47	0.0588	#NUM!	ACADM,HADHA
	CD28 Signaling in T Helper Cells	1.46	0.0174	#NUM!	CARD11,CD4,HLA-A,HLA-DMB,HLA-DRA,HLA-DRB5,NFKBIA,PTPN6,Trbc1
	PEDF Signaling	1.45	0.0357	#NUM!	NFKBIA,PNPLA2,WASF2
	IL-9 Signaling	1.44	0.0571	#NUM!	IL2RG,IL9R
	HIPPO signaling	1.44	0.0353	#NUM!	DLG1,PPP1CB,PPP2R5A
	Dilated Cardiomyopathy Signaling Pathway	1.43	0.0274	#NUM!	ADCY9,CACNA1I,CACNG1,GAB1
	Agranulocyte Adhesion and Diapedesis	1.43	0.0234	#NUM!	CCL5,CCR7,CXCL13,CXCL2,Glycam1
	MIF-mediated Glucocorticoid Regulation	1.42	0.0556	#NUM!	NFKBIA,PLA2G2D
	Regulation Of The Epithelial Mesenchymal Transition In Development Pathway	1.41	0.0345	#NUM!	DVL3,FZD6,SMO
	Cellular Effects of Sildenafil (Viagra)	1.4	0.0268	#NUM!	ADCY9,CACNG1,PLCB2,PPP1CB
	Complement System	1.4	0.0541	#NUM!	C1QB,C7
	Regulation of Cellular Mechanics by Calpain Protease	1.39	0.0337	#NUM!	CAPN9,ITGAL,VCL
	Docosahexaenoic Acid (DHA) Signaling	1.38	0.0526	#NUM!	BCL2A1,PNPLA2
	Melanocyte Development and Pigmentation Signaling	1.33	0.0319	#NUM!	ADCY9,PTPN6,SHC1
	April Mediated Signaling	1.3	0.0476	#NUM!	NFKBIA,TNFRSF13B

## Sheet: Upstream Regulators
© 2000-2021 QIAGEN. All rights reserved.
	Supplementary Table S3. Analysis of upstream regulators provided by DEGs
	Upstream Regulator	Expr Log Ratio	Molecule Type	Predicted Activation State	Activation z-score	p-value of overlap	Target Molecules in Dataset
	TNF	-0.711	cytokine	Inhibited	-3.784	0.00334	ACADM,BCL2A1,BTBD3,CAMP,CCL5,CCR7,CD4,CD83,CDK5R1,CSF1R,CSF2RB,CX3CR1,CXCL13,CXCL2,GAB1,Glycam1,HLA-A,HLA-DRA,IL16,IL27RA,ITGAL,KCNJ2,LAMP3,MUC2,NFKBIA,PLK3,SMO,VCL,ZNF750
	IFNG		cytokine	Inhibited	-3.694	0.000314	ABCB1,BCL2A1,C1QB,CCL5,CCR7,CD4,CD83,CDK5R1,CSF1R,CSF2RB,CX3CR1,CXCL2,HCK,HLA-A,HLA-DMB,HLA-DRA,HLA-DRB5,Ighg3,ITGAL,Klrk1,LAMP3,LAT2,MUC2,NFKBIA,PDHA1,PTPN6,RAB27A
	AHR	-0.072	ligand-dependent nuclear receptor	Inhibited	-3.268	0.000668	C1QB,CARD11,CCL5,CCR7,CD4,CD8B,CSF2RB,CX3CR1,CXCL13,CXCL2,IL9R,VCL
	E. coli B5 lipopolysaccharide		chemical - endogenous non-mammalian	Inhibited	-3.234	2.19e-05	CCL5,CCR7,CD83,CX3CR1,CXCL13,CXCL2,HLA-A,IL16,IL9R,ITGAL,NFKBIA
	lipopolysaccharide		chemical drug	Inhibited	-3.193	1.74e-07	ABCB1,ACADM,BCL2A1,CAMP,CCL5,CCR7,CD4,Cd52,CD83,CDK5R1,CNNM2,CNST,CSF1R,CSF2RB,CX3CR1,CXCL13,CXCL2,FBN1,GAB1,GIMAP7,HACD2,HCK,HLA-A,HLA-DMB,HLA-DRB5,IER5,Ighg3,IKZF1,IL16,IL2RG,ITGAL,ITPKC,LAMP3,LYZ,MUC2,NFKBIA,PLA2G2D,PLK3,PPP1CB,PTPN7,TFDP2,TNFRSF13B,VCL
	IL6		cytokine	Inhibited	-3.064	0.000261	BTC,CCL5,CCR7,CD83,CSF1R,CSF2RB,CX3CR1,CXCL13,CXCL2,HLA-A,HLA-DRB5,IL2RG,LYZ,NFKBIA,PLA2G2D,RAB27A,RNASE6,SMO
	E. coli B4 lipopolysaccharide		chemical toxicant	Inhibited	-2.918	0.00022	C1QB,CCL5,CCR7,Cd52,CD83,CXCL2,HLA-A,LCP1,NFKBIA,PTPN6
	dexamethasone		chemical drug	Activated	2.918	0.0017	ABCB1,ACADM,BCL2A1,C1QB,CAMP,CCL5,CD83,CD8B,CSF1R,CSF2RB,CX3CR1,CXCL2,DLG1,GAB1,GOLIM4,HLA-A,HLA-DMB,HLA-DRA,HLA-DRB5,IL16,ITPKC,LAMA2,LAPTM5,MUC2,NDUFS1,NFKBIA,PNPLA2,PPP1CB,PTPN6,SCARA5,SHC1,STON1,VCL,ZNF750
	CSF2		cytokine	Inhibited	-2.905	0.00291	BCL2A1,CARD11,CCR7,CD83,CSF1R,CSF2RB,CX3CR1,CXCL2,IL16,LAMP3,LCP1,NFKBIA
	IL10RA	-0.769	transmembrane receptor	Activated	2.813	0.00667	ABCB1,CCL5,CCR7,FBN1,HLA-A,IL2RG,Klrk1,Treml4
	TLR7	-0.783	transmembrane receptor	Inhibited	-2.764	0.00014	ACAP1,BCL2A1,CCL5,CCR7,CD83,CXCL13,CXCL2,NFKBIA,PTPN6
	tretinoin		chemical - endogenous mammalian	Inhibited	-2.677	0.117	BCL2A1,BTC,CD6,CDK5R1,CSF1R,CX3CR1,CXCL2,HADHA,HLA-A,HLA-DMB,IKZF1,IL16,ITGAL,KCNJ2,MAG,MUC2,PLCB2,PLK3,PNRC1,VCL
	CD28	-0.556	transmembrane receptor	Inhibited	-2.621	0.0385	BCL2A1,CXCL13,CXCL2,IL27RA,ITGAL,LCP1,NFKBIA
	salmonella minnesota R595 lipopolysaccharides		chemical - endogenous non-mammalian	Inhibited	-2.581	9.91e-05	CCL5,CD83,CXCL13,CXCL2,HLA-DMB,HLA-DRA,NFKBIA
	TNFSF11	-0.306	cytokine	Inhibited	-2.572	0.00069	BCL2A1,CCL5,CD83,CSF1R,HCK,HCLS1,IL9R,ITGAL,NFKBIA
	CD40LG		cytokine	Inhibited	-2.461	0.000228	BCL2A1,CCL5,CCR7,CD83,CXCL2,DCTN1,FFAR4,LAMP3,LYL1,NFKBIA,PTPN7,TNFRSF13B
	CLPP	-0.041	peptidase	Inhibited	-2.449	5.21e-05	ACADM,DLST,HADHA,OGDH,PDHA1,PDHB
	ZBTB10	0.262	other	Inhibited	-2.449	0.00288	CCL5,CCR7,CD83,Klrk1,Treml4,UNC93B1
	resiquimod		chemical drug	Inhibited	-2.416	0.000253	BCL2A1,CCL5,CCR7,CD83,CSF1R,CXCL13,CXCL2,HCK,IL16,NFKBIA
	IL1		group	Inhibited	-2.395	0.0932	CCL5,CCR7,CSF1R,CSF2RB,CXCL2,LYZ
	OSM	-1.009	cytokine	Inhibited	-2.39	0.00442	BTC,CAMP,CCL5,CXCL13,CXCL2,DCTN1,GAB1,GOLGA2,HLA-A,ITGAL,OGDH,SLC39A7
	SIRT1	0.091	transcription regulator	Activated	2.324	7.66e-06	ABCB1,ACADM,ACAP1,CCL5,CD79B,CD83,CLCA1,HCK,HLA-A,HLA-DRB5,Iglc3,IL2RG,LAMA2,LAPTM5,RNF39
	INSR	0.148	kinase	Activated	2.316	3.52e-05	ACADM,BCL2A1,CD83,CLCA1,FCGBP,HADHA,LAT2,LCP1,LYZ,MUC2,OGDH,PDHA1,PDHB,PNPLA2,SLC39A7,ZG16
	IL18	0.246	cytokine	Inhibited	-2.236	0.0282	CAMP,CCL5,CCR7,CD83,ITGAL
	CDKN2A	-0.219	transcription regulator	Inhibited	-2.236	0.132	CCL5,CCR7,CXCL13,IL2RG,RAB27A
	mono-(2-ethylhexyl)phthalate		chemical toxicant	Activated	2.236	0.00335	ACADM,HADHA,NDUFS1,OGDH,PDHB,VCL
	PSMB11		peptidase	Activated	2.236	0.00468	CCL5,CCR7,IL2RG,PLCB2,RELT
	IL2		cytokine	Inhibited	-2.23	3.43e-08	ADCY9,BCL2A1,CCL5,CCR7,CD83,CD8B,CDK5R1,CSF1R,CSF2RB,CX3CR1,DLST,Gzmc,HCK,HLA-DRA,HLA-DRB5,IL27RA,IL2RG,LAPTM5,PLA2G2D,PTPN6,PTPN7,TFDP2,TNFRSF13B
	USP22	0.169	peptidase	Inhibited	-2.219	3.67e-05	BCL2A1,CCL5,CSF2RB,LYL1,PTPN6
	GATA2	-0.138	transcription regulator	Inhibited	-2.219	0.00034	CAMP,CCL5,CSF1R,CXCL2,FCHO1,GABRP,GRM6,HBA1/HBA2,IKZF1,IL16,LYL1,ZNF750
	BCL3	-0.294	transcription regulator	Activated	2.213	0.000232	ACADM,CAMP,CCL5,CXCL2,NFKBIA
	Tlr		group	Inhibited	-2.2	0.00378	CCL5,CCR7,CD83,HLA-A,NFKBIA
	IL1A	-0.446	cytokine	Inhibited	-2.19	0.0713	CAMP,CCL5,CD83,CXCL2,NFKBIA
	fenofibrate		chemical drug	Activated	2.186	0.0311	ACADM,CSF1R,FABP7,HADHA,PDHB,PNPLA2
	Nr1h		group	Activated	2.18	0.0127	CCL5,CCR7,HCK,ITGAL,LAT2
	TLR9	-0.317	transmembrane receptor	Inhibited	-2.171	0.0658	CCL5,CCR7,CD83,CXCL2,TNFRSF13B
	FN1	0.469	enzyme	Inhibited	-2.169	0.0397	CCL5,CD83,CXCL2,MUC2,NFKBIA
	TP73	-0.117	transcription regulator	Activated	2.151	0.0291	ABCB1,CD83,CXCL2,DLG1,LCP1,LYZ,PNRC1,SMO
	IL33	-0.179	cytokine	Inhibited	-2.093	4.11e-06	BCL2A1,CCL5,Cd52,CD83,CDK5R1,CSF2RB,CXCL2,FER1L6,HBA1/HBA2,HCK,IL2RG,NFKBIA,SLC26A4,TNFRSF13B
	Ige		complex	Inhibited	-2.043	0.00296	BCL2A1,CARD11,CCL5,CXCL2,HBA1/HBA2,NFKBIA,PLK3,PTPN6,TNFRSF13B
	poly rI:rC-RNA		biologic drug	Inhibited	-2.024	0.00353	BTC,CAMP,CCL5,CCR7,CD83,CXCL2,HLA-A,HLA-DMB,IL2RG,Klrk1,LYZ,NFKBIA,PDHB,SLC26A4
	pembrolizumab		biologic drug	Inhibited	-2	0.000598	CCL5,CD4,CD83,HLA-A
	CBX5	0.154	transcription regulator	Inhibited	-2	0.00365	ABCB1,GCNT3,HBB,RNF39,SYTL2
	PLX5622		chemical drug	Inhibited	-2	0.00521	CCL5,CXCL13,IL16,IL2RG
	ESRRG	0.228	ligand-dependent nuclear receptor	Inhibited	-2	0.00647	ACADM,DLST,PDHA1,PDHB
	IL21		cytokine	Inhibited	-2	0.0203	CCL5,CCR7,CXCL13,HLA-DRB5,Klrk1
	MAP4K4	-0.161	kinase	Inhibited	-2	0.0205	DLST,HADHA,NDUFS1,OGDH
	cardiotoxin		chemical - other	Inhibited	-2	0.0227	CCL5,CSF1R,CSF2RB,CXCL13,IL16,IL2RG
	raloxifene		chemical drug	Inhibited	-2	0.0657	ADCY9,BCAS1,CCL5,PLK3
	CXCL12	-0.181	cytokine	Inhibited	-2	0.106	CCL5,CD4,HCLS1,ITGAL
	AKT1	0.202	kinase	Inhibited	-2	0.126	ABCB1,BCL2A1,CCL5,CD4,CXCL2
	GABA		chemical - endogenous mammalian	Inhibited	-2	0.518	ACADM,PDHB,SHC1,TFDP2
	KDM1A	0.089	enzyme	Activated	2	5.12e-06	AU020206,C1QB,CCL5,Cd52,CD84,CXCL13,Glycam1,HBB,HLA-A,HLA-DRB5,IL27RA,LCP1,LYZ,VCL
	NFKBIB	-0.013	transcription regulator	Activated	2	0.0013	BCL2A1,CCL5,CXCL2,NFKBIA
	arachidonic acid		chemical - endogenous mammalian	Activated	2	0.0139	BCL2A1,CD83,NFKBIA,PNPLA2
	DIO3	-0.347	enzyme	Activated	2	0.0668	CLCA1,HLA-A,IER5,LAPTM5
	TAZ	-0.054	enzyme		-1.997	0.004	C7,CCL5,CCR7,CXCL2,HADHA,LCP1
	CIITA	-0.566	transcription regulator		-1.985	0.0005	HLA-A,HLA-DMB,HLA-DRA,HLA-DRB5
	Go 6976		chemical - kinase inhibitor		1.982	0.00289	CCL5,CD83,CXCL2,NFKBIA
	fingolimod		chemical drug		1.982	0.00595	CCL5,CCR7,CXCL13,CXCL2
	TNFSF15	-0.094	cytokine		-1.98	0.000339	CCR7,CD83,CXCL2,Klrk1
	CDK9	-0.115	kinase		-1.98	0.00139	CCL5,CXCL2,HLA-DRA,NFKBIA
	Bay 11-7082		chemical - kinase inhibitor		1.98	0.00675	BCL2A1,CCL5,CD83,CXCL2
	APP	0.206	other		-1.979	0.335	CCL5,CDK5R1,CSF1R,CSF2RB,CXCL2,FBXL20,GAB1,HBA1/HBA2,ITGAL,SHC1
	IL27		cytokine		-1.974	0.0419	CCL5,HLA-A,HLA-DMB,HLA-DRA
	filgrastim		biologic drug		1.97	0.0418	CCL5,CD83,CSF1R,GOLIM4,HLA-DMB,HLA-DRA,HLA-DRB5,ITPKC
	Interferon alpha		group		-1.969	0.00253	BCL2A1,CCL5,CCR7,CD83,CSF2RB,CXCL2,HLA-A,LAMP3,NFKBIA,UNC93B1,ZNRF3
	enterotoxin B		biologic drug		-1.969	0.00545	CCL5,CSF2RB,CXCL13,CXCL2
	TNFRSF1A	0.046	transmembrane receptor		-1.96	0.0571	CCL5,CD83,CXCL13,CXCL2
	TLR3	0.316	transmembrane receptor		-1.96	0.202	CCL5,CLCA1,CXCL2,Klrk1
	E. coli lipopolysaccharide		chemical - endogenous non-mammalian		-1.954	0.00413	CCL5,CCR7,CD83,CXCL2
	peptidoglycan		chemical - endogenous non-mammalian		-1.954	0.0168	BCL2A1,CCL5,CXCL2,IL16
	IFNAR1	-0.073	transmembrane receptor		-1.951	0.0124	CCL5,CXCL13,CXCL2,HLA-A,LAMP3
	TCR		complex		-1.945	0.0019	BCL2A1,CCL5,CCR7,CD4,CD6,CD8B,CXCL13,Gzmc,IL16,NFKBIA
	SPI1	-0.786	transcription regulator		-1.944	0.00521	CCR7,CD79B,CSF1R,CSF2RB,IKZF1,LAMP3,LYZ,PTPN6
	PRKCD	0.119	kinase		-1.942	0.00154	BCL2A1,CCL5,CD4,FBN1,IL2RG,NFKBIA,PTPN6
	IL5		cytokine		-1.941	0.252	CCR7,CSF2RB,CX3CR1,IL2RG
	TICAM1	0.298	other		-1.934	0.0402	CCL5,CXCL13,CXCL2,NFKBIA
	TRAF3IP2	0.112	enzyme		-1.93	0.00393	CAMP,CCL5,CXCL2,ITGAL
	metformin		chemical drug		-1.925	0.0432	ABCB1,CCR7,DVL3,HBA1/HBA2,NFKBIA
	IKBKG	0.283	kinase		-1.915	0.0345	CCL5,CXCL2,HLA-A,NFKBIA
	TLR4	-0.005	transmembrane receptor		-1.909	0.28	CCL5,CCR7,CXCL2,NFKBIA,TNFRSF13B
	IL3		cytokine		-1.89	0.0831	CD83,CSF1R,HBA1/HBA2,HLA-A,LAMP3,PLCB2
	glucocorticoid		chemical drug		1.869	0.00157	CCL5,CD79B,CSF1R,CXCL13,CXCL2,GABRP,IL16,LAT2,NFKBIA
	NFkB (complex)		complex		-1.859	0.00196	ABCB1,BCL2A1,CAMP,CCL5,CCR7,CD83,CXCL2,DVL3,HLA-A,HLA-DMB,ITGAL,MUC2,NFKBIA,PLK3
	CHUK	-0.04	kinase		-1.833	0.0116	CCL5,CXCL13,CXCL2,Glycam1,HLA-A,NFKBIA
	PRDM1	-0.118	transcription regulator		1.811	3.52e-06	BCL2A1,CCR7,CXCL2,FAM167A,GALNT2,GIMAP7,HCK,HLA-DRA,PTPN6,SCARA5,TNFRSF13B,TSPAN10
	IL4	-0.188	cytokine		-1.782	9.38e-07	CCL5,CCR7,CD6,CD79B,CD83,CD8B,CSF1R,CSF2RB,CXCL2,DCTN1,FFAR4,FYCO1,HCK,HCLS1,HLA-DMB,HLA-DRA,HLA-DRB5,Ighg3,IL16,IL27RA,IL2RG,ITGAL,Klrk1,LYL1,MAL,MUC2,NFKBIA,PTPN7,VPS13C
	FAS	-0.082	transmembrane receptor		-1.777	0.000534	BCL2A1,CCL5,CD83,CDK5R1,CXCL2,FBN1,IL16,IL9R,LAMP3,NFKBIA,SHC1
	PPARGC1A	0.145	transcription regulator		1.766	0.0988	ACADM,LAMA2,MAL,NDUFS1,NFKBIA,PDHA1,PNPLA2
	IL17A		cytokine		-1.752	0.00472	BCL2A1,BTC,CAMP,CCL5,CD83,CXCL13,CXCL2,IL16
	BNIP3L	-0.262	other		-1.732	0.00193	CD79B,IL16,NFKBIA,TFDP2
	RNF31	-0.062	enzyme		1.732	0.00413	CCL5,CXCL13,CXCL2,IL2RG
	CPT1B	0.535	enzyme		-1.633	0.000122	ACADM,HADHA,NDUFS1,NFKBIA,OGDH,PPP1CB,PYGB,RHOQ,SHC1
	TREM1	-0.732	transmembrane receptor		-1.633	0.00195	CCL5,CCR7,CD83,CXCL2,KCNJ2,LAMP3,NFKBIA
	camptothecin		chemical drug		-1.633	0.0443	ABCB1,BCL2A1,CD83,CXCL2,DLG1,HLA-A,IER5,IL16,IL9R,NFKBIA
	CD40	-0.719	transmembrane receptor		-1.55	0.0145	BCL2A1,CCL5,CD83,ITGAL,NFKBIA,TNFRSF13B
	fluticasone propionate		chemical drug		1.544	2.35e-05	C1QB,CAMP,CCL5,CD4,CD83,CXCL2,HLA-DMB,HLA-DRA,TBC1D16
	Pam3-Cys-Ser-Lys4		chemical reagent		-1.527	3.96e-06	BCL2A1,CCL5,CCR7,CD83,CSF1R,CXCL13,CXCL2,HLA-A,HLA-DRB5,NFKBIA
	IRF8	-0.244	transcription regulator		-1.519	0.00899	CCL5,CCR7,CD4,CD83,CSF1R
	MYD88	0.011	other		-1.504	0.00125	CCL5,CD83,CXCL13,CXCL2,HCK,HLA-A,MUC2,NFKBIA,TNFRSF13B
	IL1B	-0.795	cytokine		-1.49	0.00283	ASAH2,BCL2A1,CCL5,CCR7,CD4,CD83,CSF2RB,CX3CR1,CXCL13,CXCL2,HLA-A,HLA-DRA,IL16,LCP1,MUC2,NFKBIA,PDHA1,PLK3,SHC1
	EIF4E	0.012	translation regulator		-1.48	0.000106	Cd52,CSF1R,CX3CR1,FREM2,HLA-A,LAT2,LYZ,NFKBIA,PTGES3
	P38 MAPK		group		-1.476	0.00634	BCL2A1,CCL5,CCR7,CD83,CXCL2,GOLGA2,HBP1,MAL,MUC2
	RELA	-0.147	transcription regulator		-1.463	0.026	ABCB1,BCL2A1,CAMP,CCL5,CCR7,CXCL2,NFKBIA,PLK3,PTPN6
	CpG oligonucleotide		chemical drug		-1.457	0.0221	BCL2A1,CD83,CXCL2,Glycam1,TNFRSF13B
	EGR1	0.013	transcription regulator		-1.452	0.0282	ABCB1,CDK5R1,CXCL2,LYZ,PNPLA2
	ciprofibrate		chemical drug		1.451	0.0402	ABCB1,ACADM,HADHA,NFKBIA
	NCOA2	0.18	transcription regulator		-1.432	0.00306	BCAS1,CCL5,CCR7,HLA-A,LYZ,NFKBIA
	3M-002		chemical reagent		-1.432	0.00484	ACAP1,BCL2A1,CCL5,CD83,HLA-DMB
	PML	-0.111	transcription regulator		-1.432	0.0155	ACADM,HBB,HLA-DMB,HLA-DRA,LYZ
	cholesterol		chemical - endogenous mammalian		-1.432	0.0183	Ces2a,CXCL2,HLA-DRB5,LAPTM5,LYZ,SMO
	NR1H2	0.041	ligand-dependent nuclear receptor		1.414	0.000302	CCL5,CCR7,CXCL2,ITGAL,NFKBIA,PNPLA2
	ITK	-0.675	kinase		-1.408	0.000105	CCL5,CD4,CX3CR1,HLA-A,Klrk1,LAT2
	RB1	0.166	transcription regulator		1.408	0.0161	CCL5,CD83,CDK5R1,CXCL2,DLST,FZD6,GPR61,IL16,NFKBIA,RAB27A
	methotrexate		chemical drug		1.406	0.00584	ACADM,C1QB,C7,CCL5,CSF1R,HADHA,HBA1/HBA2
	PTEN	0.28	phosphatase		1.405	0.00164	CCL5,CCR7,CX3CR1,CXCL13,CXCL2,FZD6,GPR61,HADHA,HCLS1,LAMP3,MAL,PDHA1,PDHB,PPP2R5A,UNC93B1
	STAT6	0.102	transcription regulator		-1.348	0.000888	CCL5,CCR7,CD79B,CXCL2,FYCO1,HBA1/HBA2,HBB,HCK,HLA-DMB,NFKBIA,PNPLA2,STON1
	IFN alpha/beta		group		-1.342	0.000788	CCL5,CCR7,CD83,HLA-A,Treml4
	5-O-mycolyl-beta-araf-(1->2)-5-O-mycolyl-alpha-araf-(1->1')-glycerol		chemical - endogenous non-mammalian		-1.342	0.000928	BCL2A1,CCR7,CD83,CX3CR1,CXCL2
	CD44	-0.246	other		-1.342	0.0384	ABCB1,CCL5,CCR7,CD8B,CX3CR1
	INSIG1	0.528	other		1.342	0.00302	CCL5,CCR7,CXCL13,CXCL2,RAB27A
	SYVN1	-0.172	transporter		1.342	0.00874	ADCY9,ANO10,DCTN1,HLA-A,PNPLA2
	IL15	0.052	cytokine		-1.318	0.000855	CCL5,CD83,CD84,CD8B,CX3CR1,CXCL2,Gzmc,HLA-DRA,IL2RG,Klrk1,NFKBIA,TFDP2
	GATA1		transcription regulator		1.309	0.00125	ARHGAP4,CCL5,HBA1/HBA2,HBB,IKZF1,LYL1,LYZ,PTPN6,TFDP2
	CD3		complex		-1.29	0.000556	BCL2A1,CCL5,CD4,CD83,CD8B,IL16,IL27RA,IL2RG,LCP1,NFKBIA,OGDH,PTPN7,SHC1,SMO,TFDP2
	Salmonella enterica serotype abortus equi lipopolysaccharide		chemical toxicant		-1.231	0.017	CCL5,CCR7,CXCL2,KCNJ2,LAMP3
	Immunoglobulin		complex		-1.229	3.71e-07	BCL2A1,C7,CCL5,CCR7,Cd52,CD83,CLCA1,CSF1R,CSF2RB,CX3CR1,CXCL13,CXCL2,DLST,Gzmc,HCK,HLA-A,IL2RG,NDUFS1,NFKBIA,OGDH,PDHA1,PDHB,PLK3,SLC6A9
	IgG		complex		-1.222	0.00705	CCL5,CD83,IL16,IL2RG,ITGAL,NFKBIA,PTPN6,TNFRSF13B
	calcitriol		chemical drug		-1.205	0.0114	ABCB1,ADCY9,CAMP,CCL5,CDK5R1,CSF1R,CXCL2,FBN1,MAL,NFKBIA,PDHA1,VCL
	SATB1	-0.288	transcription regulator		-1.195	0.000708	BCL2A1,HBB,HLA-DMB,IKZF1,IL16,MAL,PTGES3
	STAT3	-0.034	transcription regulator		-1.179	0.00637	CCL5,CD83,CXCL13,CXCL2,DVL3,HBB,HLA-A,HLA-DRB5,IL9R,Klrk1,LYZ,PTPN6,RAB27A
	pyrrolidine dithiocarbamate		chemical reagent		1.172	0.00314	BCL2A1,CCL5,CXCL2,HLA-DRA,NFKBIA
	levodopa		chemical - endogenous mammalian		1.155	0.0166	AREL1,ARHGAP4,BTBD3,CRY2,GOLIM4,HCLS1,HLA-A,LAPTM5,LAT2,SERAC1,SHC1,SKAP1
	isoprenaline		chemical drug		1.154	0.0005	HBA1/HBA2,HBB,IER5,PNPLA2
	AGT	-0.304	growth factor		-1.152	0.0148	ASAH2,CCL5,CCR7,CX3CR1,CXCL2,DVL3,GAB1,HCLS1,IKZF1,KCNJ2,NDUFS1,NFKBIA,RELT,SHC1,ZG16
	MAP3K14	-0.303	kinase		-1.091	0.0057	CCL5,CXCL2,MUC2,NFKBIA
	MTOR	0.198	kinase		-1.071	9.73e-05	ACADM,BCL2A1,CCR7,CSF1R,CXCL2,DCTN1,HADHA,HBA1/HBA2,MAG,PDHA1,PTPN6,PYGB
	niacinamide		chemical - endogenous mammalian		1.067	0.00792	BCL2A1,CAMP,CNNM2,SHC1
	MYB	0.316	transcription regulator		1.067	0.0212	ACAP1,CD4,CXCL2,GIMAP7,GRAP
	beta-estradiol		chemical - endogenous mammalian		1.003	0.00161	ABCB1,ACADM,ADCY9,BCAS1,BCL2A1,CCL5,CDK5R1,CLCA1,CSF2RB,CXCL13,CXCL2,FBN1,GAB1,GABRP,Glycam1,Gzmc,HBA1/HBA2,HBB,HBP1,HLA-A,HLA-DRB5,Klrk1,LAMA2,LAPTM5,LYL1,LYZ,MAL,NFKBIA,OGDH,PPP1CB,PTPN6,RHOQ,SHC1,SLC6A9,STON1,VCL
	IL22		cytokine		-1.002	0.00152	CAMP,CCL5,CLCA1,CXCL13,CXCL2,MUC2
	erlotinib		chemical drug		-1	0.0126	BTC,CCL5,FBN1,NFKBIA
	N-nitro-L-arginine methyl ester		chemical drug		-1	0.0126	ACADM,CD83,CXCL2,NFKBIA
	TAL1	0.222	transcription regulator		1	0.00386	BTBD3,FBN1,HADHA,HBB,HLA-A,IL27RA,RNASE6
	RUNX3	-0.664	transcription regulator		1	0.0059	CCR7,CD4,CSF1R,FBN1,ITGAL
	epicatechin		chemical drug		1	0.0103	Cd52,FBN1,HACD2,PTPN6
	tacrolimus		chemical drug		1	0.0231	CCL5,CD6,CD8B,CXCL2,IL16,NFKBIA
	ADORA2A	-0.387	G-protein coupled receptor		1	0.0345	CSF1R,CXCL2,HBA1/HBA2,NFKBIA
	Z-LLL-CHO		chemical - protease inhibitor		0.949	0.0357	CCL5,CXCL2,HBB,MUC2,NFKBIA,PLK3,PTPN6
	hyaluronic acid		chemical - endogenous mammalian		-0.943	6.8e-05	ABCB1,CCL5,CCR7,CD83,CSF1R,CXCL2,NFKBIA
	thapsigargin		chemical toxicant		-0.916	0.000126	ABCB1,ACADM,CAMP,CD83,CXCL2,LAMP3,NFKBIA,PTPN6,VCL
	D-glucose		chemical - endogenous mammalian		-0.916	0.012	ABCB1,ACADM,CDK5R1,CSF1R,CXCL2,GALNT2,LCP1,OGDH,PLK3,PTPN6,SHC1,SLC39A7,VCL
	IFIH1	0.149	enzyme		-0.914	0.00077	CCL5,CD4,CXCL2,NFKBIA
	OGA	0.084	enzyme		-0.898	9.87e-05	ACADM,C1QB,CSF1R,CSF2RB,CX3CR1,DLST,FABP7,FZD6,LPXN,NDUFS1,OGDH,PDHA1,RAB27A
	IL10		cytokine		0.879	3.25e-08	ABCB1,BCL2A1,CAMP,CCL5,CCR7,CD83,CLCA1,CSF1R,CSF2RB,CX3CR1,CXCL13,CXCL2,HCK,HLA-DRB5,IL2RG,ITGAL,LAMP3,MUC2,TNFRSF13B
	KITLG	0.302	growth factor		-0.849	0.00801	CXCL2,HCK,IL16,LAPTM5,NFKBIA,PTGES3,SHC1
	CAMP	-1.356	other		0.842	4.02e-05	BTC,CAMP,CCL5,CCR7,CD83,CXCL13,MUC2
	C5	-0.353	cytokine		-0.832	0.0253	CCL5,CXCL2,NFKBIA,PLK3
	BMP10		growth factor		-0.816	0.000184	CD83,CX3CR1,CXCL13,HLA-A,ITGAL,NFKBIA
	daidzein		chemical drug		-0.816	0.000206	CD4,HLA-A,LAPTM5,OGDH,PTPN6,RASAL3
	ARNT2	-0.228	transcription regulator		-0.816	0.00993	CACNG1,Cd52,HLA-A,LAMA2,LCP1,ZG16
	SIM1		transcription regulator		-0.816	0.0121	CACNG1,Cd52,HLA-A,LAMA2,LCP1,ZG16
	cyclosporin A		biologic drug		0.816	0.000694	CAMP,CCL5,CCR7,CD6,CD83,CD8B,CX3CR1,FREM2,IL16,ITGAL,MUC2,NFKBIA
	ADIPOQ	0.145	other		0.816	0.00651	CCL5,CXCL2,FZD6,Klrk1,NFKBIA,PDHB,SHC1
	IKBKB	-0.032	kinase		-0.808	0.015	CCL5,CCR7,CSF1R,CXCL2,HLA-A,MUC2,NFKBIA
	JUN	-0.252	transcription regulator		-0.798	0.0344	ABCB1,BCL2A1,C1QB,CAMP,CDK5R1,CSF1R,FABP7,NFKBIA,PTPN6
	IFNB1		cytokine		-0.771	0.0492	CCL5,CD83,CXCL2,FBN1,HLA-A,VCL
	genistein		chemical drug		-0.764	6.87e-05	CCL5,CD4,CX3CR1,CXCL2,Gzmc,HLA-A,KCNJ2,LAPTM5,MUC2,OGDH,PLK3,PTPN6,RASAL3
	eicosapentenoic acid		chemical drug		0.762	0.0122	CD83,CSF1R,FBN1,PNPLA2
	CXCL8		cytokine		-0.747	0.00675	ABCB1,CXCL2,ITGAL,NFKBIA
	Alpha catenin		group		0.73	0.000713	ADAMTS12,CXCL2,IL2RG,LAMA2,LYZ,NFKBIA
	tetradecanoylphorbol acetate		chemical drug		-0.725	7.67e-06	ABCB1,ASAH2,BCL2A1,BTC,CCL5,CCR7,CD4,CDK5R1,CSF1R,CXCL13,CXCL2,FBN1,FCGBP,GABRP,Gzmc,HLA-DRA,IKZF1,IL2RG,ITGAL,LYZ,MUC2,NFKBIA,PLCB2,PTPN6,RAB27A,TNFRSF13B,VCL
	Fcer1		complex		-0.692	0.000232	BCL2A1,CCL5,CD4,CD83,IL16
	MAP2K1	0.455	kinase		-0.689	0.0298	ABCB1,BCL2A1,CCL5,MAG,NFKBIA
	CSF3	-0.661	cytokine		-0.647	0.000185	CCL5,CCR7,CX3CR1,CXCL2,HLA-DRA,LYZ,PLCB2,RAB27A
	NFKBIA	-0.597	transcription regulator		-0.636	0.0212	BCL2A1,CAMP,CCL5,CXCL2,HLA-A,LYZ,MUC2,NFKBIA,PDHA1
	MAP3K7		kinase		-0.627	0.00521	CCL5,CCR7,CXCL2,MUC2
	triamcinolone acetonide		chemical drug		0.625	0.0371	BCL2A1,CD79B,HCK,NFKBIA,PTPN7
	PD98059		chemical - kinase inhibitor		0.571	0.0343	CAMP,CCL5,CD4,CD83,CDK5R1,CXCL2,IL27RA,MUC2,NFKBIA,TNFRSF13B
	NFKB2	-0.257	transcription regulator		-0.557	0.00208	CCL5,CCR7,CD83,CXCL13,Glycam1,HLA-DMB
	paclitaxel		chemical drug		-0.557	0.0068	ABCB1,CRY2,CXCL2,HLA-A,ITPKC,LCP1,MUC2,NFKBIA
	NFATC2	-0.16	transcription regulator		0.555	0.0025	CCL5,CCR7,CD83,CX3CR1,CXCL2,IKZF1,NFKBIA
	resveratrol		chemical drug		0.532	0.0211	BCL2A1,CCL5,CSF1R,CX3CR1,CXCL2,ITGAL,NFKBIA
	NR4A1	0.119	ligand-dependent nuclear receptor		-0.522	0.00384	CCL5,DLST,IL16,NDUFS1,NFKBIA,OGDH,PDHA1,PDHB
	trichostatin A		chemical drug		0.522	0.00107	ABCB1,BCL2A1,CAMP,CCR7,CD79B,CDK5R1,HBA1/HBA2,HBB,HLA-DRA,IKZF1,LAMA2,MUC2,NFKBIA,PTPN6,PTPN7,SHC1,SMO,VCL
	TGFB1	-0.482	growth factor		-0.496	0.0297	ADAMTS12,ADCY9,C1QB,CAMP,CCL5,CCR7,CD4,CD83,CD8B,CDK5R1,CSF1R,CX3CR1,CXCL13,CXCL2,FBN1,HLA-DRA,HLA-DRB5,Ighg3,ITGAL,NFKBIA,PDHB,PPP2R5A,PTPN6,RAB5IF,VCL
	histamine		chemical - endogenous mammalian		-0.447	0.000978	CCL5,CLCA1,CXCL2,IL16,MUC2
	TCF3	-0.157	transcription regulator		-0.447	0.0118	ARHGAP4,CD4,CD79B,CD8B,CSF1R,HADHA,IL16,IL9R,MAL
	Tnf (family)		group		-0.447	0.031	BCL2A1,CCL5,CD4,IL2RG,NFKBIA
	S100A9	-0.319	other		0.447	0.0182	C1QB,CSF2RB,MAG,PLK3,RNASE6
	butyric acid		chemical - endogenous mammalian		-0.44	0.00024	ABCB1,BCL2A1,C7,CAMP,CD79B,CD83,HBA1/HBA2,HBB,HLA-DRA,MUC2,NFKBIA,PLCB2,PTPN7
	forskolin		chemical toxicant		-0.42	0.0155	ADCY9,CACNA1I,CAMP,CCL5,CD4,CXCL13,CXCL2,HLA-DRA,MUC2,NFKBIA,RAB27A,SHC1,VCL
	NOTCH1	0.075	transcription regulator		-0.415	0.00994	CD84,CSF1R,CSF2RB,FABP7,HBA1/HBA2,MUC2,NDUFS1
	IL13		cytokine		0.402	0.0171	BCL2A1,CCL5,CD4,CLCA1,CXCL2,HLA-DRB5,MUC2,PLA2G2D,SLC26A4
	TRAF3	-0.013	enzyme		0.394	0.0016	CCL5,CXCL13,CXCL2,IL9R,NFKBIA
	5-azacytidine		chemical drug		0.348	0.0199	ABCB1,ITGAL,MUC2,PNRC1,SHC1
	sirolimus		chemical drug		-0.343	0.0183	ACADM,BCL2A1,CCR7,CX3CR1,DVL3,IL16,MUC2,PDHA1,PYGB,RHOQ,SLC6A9
	prostaglandin E2		chemical - endogenous mammalian		-0.3	0.00554	CAMP,CCL5,CCR7,CD83,CNNM2,IL16,IL2RG,MUC2,NFKBIA
	TP53	-0.042	transcription regulator		-0.285	0.00702	ABCB1,ACADM,ATL3,BCL2A1,CARD11,CCL5,CSF1R,CXCL2,DLG1,DLST,FZD6,GPR61,HADHA,IER5,IL16,IL27RA,KCNJ2,LAMP3,LYZ,MUC2,NDUFS1,NFKBIA,OGDH,PDHA1,PDHB,PTPN6,SHC1,VCL
	IKBKE	0.149	kinase		0.281	1.7e-05	CCL5,CXCL2,DLST,FCRL5,HLA-A,NFKBIA,PDHA1
	calcimycin		chemical reagent		-0.276	0.0194	CD83,DVL3,MUC2,SHC1
	NFAT5	0.009	transcription regulator		-0.271	0.00208	BCL2A1,HLA-DMB,HLA-DRB5,MUC2,NFKBIA,VCL
	IGF1R	-0.249	transmembrane receptor		0.265	0.0473	ACADM,CCL5,CD84,HADHA,IL16,SCARA5
	KLF2	-0.313	transcription regulator		0.243	0.00137	CCL5,CCR7,CX3CR1,CXCL2,HBB,IL2RG,NFKBIA
	VIP	-0.32	other		-0.24	0.0158	CCL5,CXCL2,LYZ,NFKBIA
	S100A8	-0.596	other		0.239	0.00121	C1QB,CSF2RB,CXCL2,MAG,NFKBIA,PLK3,RNASE6
	phytohemagglutinin		chemical drug		0.219	0.00574	CCL5,CCR7,CD83,FBN1,IL2RG,LAMA2,PDHB,SHC1
	17-alpha-ethinylestradiol		chemical drug		-0.218	7.75e-05	ABCB1,C1QB,CCL5,CCR7,CSF1R,FABP7,Gzmc,PLK3
	ELF4	0.332	transcription regulator		-0.218	0.000305	ABCB1,CCR7,CXCL2,LYZ
	ionomycin		chemical reagent		-0.179	0.0287	BCL2A1,CD4,IKZF1,ITGAL,KCNJ2
	CTCF	-0.032	transcription regulator		-0.152	0.0069	Cd52,CD83,HLA-DRB5,LYZ,MUC2
	RUNX1	-0.22	transcription regulator		0.152	0.0273	CD4,CSF1R,CSF2RB,FHDC1,HBA1/HBA2,ITGAL
	RIPK2	-0.049	kinase		-0.147	0.00356	ACADM,CCL5,CXCL2,PNPLA2
	alitretinoin		chemical drug		0.13	0.0134	ACADM,BCL2A1,CD83,CXCL13,HLA-DRA
	NFKB1	-0.069	transcription regulator		0.124	0.00472	ABCB1,BCL2A1,CCL5,CXCL2,HLA-DMB,NFKBIA,PLK3,PTPN6
	HSPA5	0.011	enzyme		-0.117	0.00105	ACADM,CCL5,HADHA,MAG
	ATP-gamma-S		chemical reagent		-0.106	2.74e-05	ASAH2,CCR7,CD83,CSF1R,CXCL2,IL16
	1,4-bis[2-(3,5-dichloropyridyloxy)]benzene		chemical toxicant		0.106	0.0211	ACADM,Ces2a,ENKD1,PNPLA2
	SP600125		chemical - kinase inhibitor		-0.101	0.00718	ABCB1,CCL5,CD83,CDK5R1,CSF1R,CXCL2,LAPTM5,NFKBIA
	YBX1	0.088	transcription regulator		-0.037	0.00302	ABCB1,CCL5,CXCL2,HBB,HLA-DRA
	CCR2	-0.407	G-protein coupled receptor		-0.034	0.000496	C1QB,CCL5,CXCL13,CXCL2,FBN1,ITGAL
	cisplatin		chemical drug		-0.032	0.0248	ABCB1,ACADM,BCL2A1,CCL5,CLCA1,EEF2K,GPR61,HADHA,HBA1/HBA2,IER5,LYZ,NFKBIA,PLK3
	OGT	0.223	enzyme		0	0.000353	ACADM,BTC,CXCL2,DLST,NDUFS1,OGDH
	TREM2	-0.326	transmembrane receptor		0	0.00139	CCR7,CX3CR1,CXCL2,NFKBIA
	PPIF	0.43	enzyme		0	0.00922	CCL5,CX3CR1,CXCL2,IL16
	2-amino-5-phosphonovaleric acid		chemical - other		0	0.0377	C5orf51,FHDC1,PLK3,ZNF750
	HDAC1	0.032	transcription regulator		0	0.0412	ABCB1,CCL5,CD4,CSF1R,NFKBIA,PTPN6
	semaxinib		chemical drug			3.58e-07	C1QB,CARD11,CCR7,CD4,CD8B,CSF2RB,CX3CR1,CXCL13,CXCL2,NFKBIA
	DYSF	-0.219	other			2.12e-06	C1QB,Cd52,CD83,HLA-A,HLA-DRB5,LCP1,LYZ,Mir142hg
	MAPT	-0.438	other			2.9e-05	AU020206,C1QB,Cd52,CD84,CDK5R1,CXCL13,CXCL2,DCTN1,DLG1,Glycam1,HBA1/HBA2,HLA-A,HLA-DRB5,LCP1,LYZ,OGDH
	Ferritin		complex			5.41e-05	CCL5,HBB,NFKBIA
	interferon beta-1a		biologic drug			0.000116	CD4,CSF1R,HLA-DRB5,IL16,LAMP3,MAL,NFKBIA
	BIRC5	0.017	other			0.000133	Cd52,CXCL13,FBN1,IL2RG,LYZ
	Ap1 gamma		group			0.000229	CD8B,HLA-A
	CAMK2D	-0.046	kinase			0.000345	HBA1/HBA2,HBB,PPP2R5A
	TNFSF13B	-0.512	cytokine			0.000356	BCL2A1,CCR7,CD83,HLA-DMB,IL2RG
	NOD2	-0.125	other			0.000524	BCL2A1,CAMP,CCL5,CXCL2,NFKBIA
	mir-150		microRNA			0.000547	CD4,CXCL2,IKZF1,Klrk1
	LY6E	0.033	other			0.000684	CD83,HLA-DRA,NFKBIA
	RECQL4	-0.046	enzyme			0.000756	ABCB1,HBB
	RFXANK	0.069	transcription regulator			0.000756	HLA-A,HLA-DRA
	LTBR	0.03	transmembrane receptor			0.000902	CXCL13,Glycam1,LYZ,NFKBIA
	lipoarabinomannan		chemical - endogenous non-mammalian			0.00104	CAMP,CXCL2,HLA-DRB5
	NR1H3	0.101	ligand-dependent nuclear receptor			0.00107	CCL5,CCR7,CD4,CX3CR1,CXCL2,ITGAL,LYZ,NFKBIA
	lestaurtinib		chemical drug			0.00113	LYZ,PTPN6
	BCL2L11	-0.2	other			0.00134	CCL5,CD84,CXCL2
	DAB1	0.081	other			0.00157	CDK5R1,FABP7
	CLIC4	0.161	ion channel			0.00157	CCL5,CXCL2
	Muc4	0.755	other			0.00157	LYZ,MUC2
	Clec2d (includes others)	-0.694	transmembrane receptor			0.00157	CCL5,CXCL2
	TRADD	0.112	other			0.00187	BCL2A1,CXCL2,NFKBIA
	MALP-2s		chemical reagent			0.00187	BCL2A1,CAMP,CXCL2
	B2M	-0.265	transmembrane receptor			0.00207	CD8B,HLA-A,HLA-DRB5
	IRAK3	-0.004	kinase			0.00207	BCL2A1,CXCL2,NFKBIA
	POU3F3	-0.556	transcription regulator			0.00208	CDK5R1,FABP7
	Rfx5	0.186	other			0.00208	HLA-A,HLA-DRA
	ULBP1	0.335	transmembrane receptor			0.00208	CD83,HLA-A
	TYROBP	-0.542	transmembrane receptor			0.00217	CCR7,CD83,CD84,NCKAP1L
	CLEC7A	-0.564	transmembrane receptor			0.00228	CCR7,CLCA1,CXCL2
	PTX3	-0.3	other			0.00251	CCL5,CX3CR1,CXCL2
	PSMB9	-0.24	peptidase			0.00266	HLA-A,NFKBIA
	RP 73401		chemical toxicant			0.00266	CXCL2,VCL
	BQ 123		biologic drug			0.00266	CCR7,CXCL2
	OSCAR		other			0.00328	CD83,CX3CR1,CXCL2
	rhesus theta-defensin 1		chemical - endogenous mammalian			0.00331	CCL5,CXCL2
	TLR2/3/4/9		group			0.00331	CCR7,CD83
	sobetirome		chemical drug			0.00331	HBA1/HBA2,HBB
	CTTN	0.273	other			0.00331	CCL5,CXCL2
	perilla alcohol		chemical drug			0.00331	BCL2A1,NFKBIA
	TBP	0.018	transcription regulator			0.00356	ABCB1,BCL2A1,HLA-A,NFKBIA
	RYR1	-0.147	ion channel			0.00356	ACADM,HADHA,PDHA1
	SELP	-0.016	transmembrane receptor			0.00356	BCL2A1,CXCL2,HCK
	RC3H1	0.154	enzyme			0.00374	CCL5,CCR7,CXCL13,CXCL2
	FLT3LG	-0.562	cytokine			0.00374	CCL5,CCR7,CD83,CXCL2
	NCSTN	0.185	peptidase			0.00386	CD84,CSF1R,CSF2RB
	NLRP12	-0.275	other			0.00386	CXCL13,CXCL2,HLA-A
	vinblastine		chemical drug			0.00386	ABCB1,CCL5,HLA-A
	ZBTB7B	0.199	transcription regulator			0.00393	ACADM,CD4,CD8B,HADHA
	1-hydroxy-2-methyl-2-butenyl 4-diphosphate		chemical - endogenous non-mammalian			0.00402	CCR7,CXCL13
	Traj18		other			0.00402	CCL5,CXCL2
	CARD14	-0.166	other			0.00402	CCR7,CXCL2
	CAMK2G	0.023	kinase			0.00402	HBA1/HBA2,HBB
	STAT5A	-0.227	transcription regulator			0.00409	ABCB1,BCL2A1,GCNT3,Glycam1,Gzmc,Klrk1,RNF39,SYTL2
	mir-130		microRNA			0.00418	ABCB1,CAMP,CCL5
	CD4	-0.915	transmembrane receptor			0.00418	CD4,CXCL13,SHC1
	ATG16L1	0.059	enzyme			0.00479	CXCL2,NFKBIA
	diaminopimelic acid		chemical - endogenous non-mammalian			0.00479	CCL5,CD4
	RARB	0.213	ligand-dependent nuclear receptor			0.00486	ACADM,ARHGAP4,BCL2A1,CXCL2,DLG1,LYZ
	TLR7/8		group			0.00521	BCL2A1,NFKBIA,PNRC1
	zymosan		chemical - endogenous non-mammalian			0.00521	ACADM,CCL5,CCR7,CXCL2
	TNIP1	0.24	other			0.00558	CD4,CXCL2,HLA-A
	BPIFA1		other			0.00563	CAMP,CXCL2
	HLA-A	-0.785	other			0.00563	HLA-A,Klrk1
	B4GALNT1	-0.554	enzyme			0.00563	C1QB,MAG
	PLA2G2E	0.53	enzyme			0.00563	CAMP,CCL5
	PCGEM1		other			0.00598	OGDH,PDHA1,PDHB
	S-nitrosoglutathione		chemical toxicant			0.00598	CCL5,HLA-DRA,NFKBIA
	MHC II		group			0.00638	HBA1/HBA2,HBB,HLA-DRB5
	CD2	-0.938	transmembrane receptor			0.00638	CCR7,CD4,ITGAL
	SELPLG	-0.607	other			0.00638	BCL2A1,CXCL2,HCK
	MVP	0.106	other			0.00653	CD83,CXCL2
	metoprolol		chemical drug			0.00653	HBA1/HBA2,HBB
	DMP1	-0.267	other			0.00681	C1QB,CX3CR1,SLC6A9
	maslinic acid		chemical - endogenous non-mammalian			0.00703	FBXW5,IL2RG,PLCB2,SHC1
	HBB	1.147	transporter			0.00725	CCL5,CXCL2,HBA1/HBA2
	TIFA	-0.37	other			0.00749	CCL5,NFKBIA
	AIMP1	0.009	cytokine			0.00749	CCL5,CXCL2
	RFX5		transcription regulator			0.00749	HLA-DMB,HLA-DRA
	vadimezan		chemical drug			0.00749	CCL5,NFKBIA
	NPC1	0.144	transporter			0.00762	CAMP,CD79B,HLA-DRB5,LYZ
	MYOC	0.319	other			0.00762	DLG1,FBN1,KCNJ2,LAMA2
	SENP3	-0.005	peptidase			0.0077	CD4,CD8B,HLA-A
	Pam3-Cys		chemical toxicant			0.0077	CCL5,CD83,CXCL2
	TLR8	0.495	transmembrane receptor			0.00817	CCR7,CD83,CXCL2
	IL1RL2	0.194	transmembrane receptor			0.00851	CD83,CXCL2
	POU3F2	-0.001	transcription regulator			0.00851	CDK5R1,FABP7
	LY96	-0.06	transmembrane receptor			0.00851	CCL5,CXCL2
	CXCL2	-1.112	cytokine			0.00851	CCL5,CXCL2
	VIPR1	0.3	G-protein coupled receptor			0.00851	CCL5,CXCL2
	BCL10	0.086	transcription regulator			0.00851	CCL5,CXCL2
	cyclopiazonic acid		chemical - endogenous non-mammalian			0.00851	BCL2A1,CXCL2
	eicosa-11Z, 14Z-dienoic acid		chemical - endogenous mammalian			0.00879	PNPLA2
	Patched		group			0.00879	SMO
	Ryr		group			0.00879	KCNJ2
	coactivator-Dtx-Notch-Rbpsuh		complex			0.00879	MAG
	miocamycin		chemical drug			0.00879	MUC2
	loxoprofen		chemical drug			0.00879	MUC2
	ZNF496	-0.071	transcription regulator			0.00879	HBB
	FOXN2	0.215	transcription regulator			0.00879	HBB
	SNORD21		other			0.00879	HLA-A
	HDLBP	0.309	transporter			0.00879	CSF1R
	B3GNT6	-0.24	enzyme			0.00879	MUC2
	USP9Y		peptidase			0.00879	MUC2
	MACROD1	0.05	enzyme			0.00879	NFKBIA
	PPP3CC	-0.266	phosphatase			0.00879	ITPKC
	DNAJC15	0.216	other			0.00879	ABCB1
	IL34	-0.095	other			0.00879	CSF1R
	PGS1	-0.161	enzyme			0.00879	CD4
	SMG6	0.041	enzyme			0.00879	HBB
	cis-vaccenic acid		chemical - endogenous mammalian			0.00879	PNPLA2
	PRPF4	-0.073	other			0.00879	CCL5
	TRAK2	0.22	transporter			0.00879	KCNJ2
	mir-583		microRNA			0.00879	IL2RG
	EPSTI1	0.105	other			0.00879	NFKBIA
	Raet1d/Raet1e	0.39	other			0.00879	HLA-A
	LINC00278		other			0.00879	EEF2K
	DPF2	0.125	transcription regulator			0.00879	CXCL13
	GUCA2B	-0.005	other			0.00879	SLC26A4
	EPS15	0.17	other			0.00879	CD4
	TONSL	0.06	other			0.00879	CCL5
	CTNNA1	0.163	other			0.00879	VCL
	AM114		chemical reagent			0.00879	DVL3
	GRM7	-0.318	G-protein coupled receptor			0.00879	GRM6
	HSP-990		chemical drug			0.00879	HLA-A
	clomoxir		chemical reagent			0.00879	ACADM
	mitoguazone		chemical drug			0.00879	ITGAL
	Triton X-100		chemical reagent			0.00879	PPP1CB
	anthraquinone		chemical toxicant			0.00879	CCL5
	gemtuzumab ozogamicin		biologic drug			0.00879	ABCB1
	NEF inhibitor B9		chemical reagent			0.00879	CD4
	oxfenicine		chemical - endogenous non-mammalian			0.00879	ACADM
	ZFP36	-0.114	transcription regulator			0.00922	CAMP,CXCL2,NFKBIA,PNRC1
	CHD1	0.197	enzyme			0.00959	BCL2A1,CXCL2
	PSMB8	-0.255	peptidase			0.00959	KCNJ2,NFKBIA
	CD70		cytokine			0.00959	BCL2A1,Klrk1
	Hsp70		group			0.00969	CD83,CDK5R1,NFKBIA
	ITGB2	-0.745	transmembrane receptor			0.0102	BCL2A1,CXCL2,ITGAL
	FOLR1	-0.112	transporter			0.0103	Cd52,CLCA1,GIMAP1,LYZ
	NRAS	-0.071	enzyme			0.0104	ACADM,CCL5,CX3CR1,CXCL2,HLA-A,RNASE6
	EBF1	-0.587	transcription regulator			0.0106	CCL5,CD79B,PPP1CB,PYGB,RHOQ
	pomalidomide		chemical drug			0.0107	HBB,IKZF1
	inosine		chemical - endogenous mammalian			0.0108	C1QB,CXCL13,LCP1
	carrageenan		chemical drug			0.0108	CCL5,CXCL2,NFKBIA
	bee venom		chemical - endogenous non-mammalian			0.011	CCL5,CNNM2,ITPKC,NFKBIA
	LDL		complex			0.0111	BCL2A1,CCL5,CCR7,CX3CR1,CXCL13,CXCL2,SHC1
	ABCB1	0.614	transporter			0.0114	ABCB1,CXCL2,PLK3
	C2CD5	0.151	other			0.0119	ACADM,PNPLA2
	PHLPP1	0.222	enzyme			0.0119	CSF1R,CXCL2
	S1PR2	0.037	G-protein coupled receptor			0.0119	CAMP,CCL5
	PAEP		other			0.0119	CCL5,CD83
	PLIN1	0.298	other			0.0119	ACADM,HADHA
	KLF13	0.108	transcription regulator			0.0119	CCL5,HBB
	PS-1145		chemical - kinase inhibitor			0.0119	CCL5,NFKBIA
	RNA polymerase II		complex			0.0124	CCL5,CD4,CD83,CXCL2,HBB,MAL,NFKBIA
	MOG		other			0.0126	CCL5,CXCL2,ITGAL
	ICAM1	-0.488	transmembrane receptor			0.0126	CCL5,CXCL2,ITGAL
	STAP2	0.092	other			0.0132	CCR7,CXCL2
	NOD1	-0.065	other			0.0132	CCL5,CXCL2
	MSR1	-0.593	transmembrane receptor			0.0132	CCL5,CXCL2
	HRG		other			0.0132	C1QB,CD83
	fumonisin B1		chemical toxicant			0.0132	ABCB1,HADHA
	S-(2,3-bispalmitoyloxypropyl)-cysteine-GDPKHPKSF		chemical reagent			0.0132	CAMP,CCL5
	CAT	-0.06	enzyme			0.0132	BCL2A1,CLCA1,HLA-DRA
	CEBPE	-0.507	transcription regulator			0.0132	CAMP,CSF1R,LYZ
	mir-142	-0.485	microRNA			0.0132	ADCY9,Gzmc,RHOQ
	CD5	-0.25	transmembrane receptor			0.0138	CCR7,CD4,IL2RG
	Lymphotoxin		complex			0.0145	CCL5,CXCL13
	DHX9	0.189	enzyme			0.0145	ABCB1,CCL5
	RNASE1	-0.321	enzyme			0.0145	CCL5,IL16
	SUV39H1	-0.101	enzyme			0.0145	CSF1R,HBB
	CD14	0.105	transmembrane receptor			0.0145	BCL2A1,CCL5,CXCL2
	EBI3	-0.708	cytokine			0.0145	HLA-A,HLA-DMB,HLA-DRA
	caffeic acid phenethyl ester		chemical drug			0.0158	ABCB1,CD83,MUC2,NFKBIA
	TNFSF9		cytokine			0.0158	CCR7,CD4
	PTGER2	-0.283	G-protein coupled receptor			0.0163	CCL5,CCR7,CSF1R,ITGAL
	QKI	-0.046	other			0.0166	CSF1R,FABP7,LAMP3
	LTB	-1.048	cytokine			0.0172	CXCL13,Glycam1
	TFPI2	-0.233	other			0.0172	ABCB1,CXCL2
	RARRES2	-0.268	transmembrane receptor			0.0172	CCL5,CXCL2
	SUPT20H		other			0.0172	BCL2A1,NFKBIA
	evodiamine		chemical - endogenous non-mammalian			0.0172	ABCB1,BCL2A1
	AZprime5576		chemical reagent			0.0175	BCL2A1
	L-leucine		chemical - endogenous mammalian			0.0175	CXCL2
	miglitol		chemical drug			0.0175	ITGAL
	CASK	0.281	kinase			0.0175	DLG1
	FAM168A	0.134	other			0.0175	NFKBIA
	ARL16	-0.014	other			0.0175	CCL5
	Raet1a		other			0.0175	HLA-A
	BCL6 peptide inhibitor		chemical reagent			0.0175	BCL2A1
	Raet1b		other			0.0175	HLA-A
	AP1M1	-0.101	transporter			0.0175	HLA-A
	MMP10	-0.472	peptidase			0.0175	CXCL2
	HLTF	0.093	transcription regulator			0.0175	HBB
	CELA1	0.461	peptidase			0.0175	HLA-A
	RAET1E		other			0.0175	Klrk1
	ACP3	0.408	phosphatase			0.0175	SHC1
	H60a		other			0.0175	HLA-A
	DCTN4	0.021	other			0.0175	CCL5
	poly-L-glutamic acid-peptoid 1 conjugate QM56		chemical reagent			0.0175	CCL5
	NAGLU	0.149	enzyme			0.0175	LYZ
	ATP6V0C	0.188	transporter			0.0175	CD4
	ADGRV1	-0.102	G-protein coupled receptor			0.0175	HBA1/HBA2
	SLC25A12	0.078	transporter			0.0175	CCL5
	12-hydroxyeicosapentaenoic acid		chemical - endogenous mammalian			0.0175	CXCL2
	HCST	-0.115	transmembrane receptor			0.0175	Klrk1
	GBP2	0.145	enzyme			0.0175	HLA-A
	HBG1		other			0.0175	HBA1/HBA2
	CLEC2D		transmembrane receptor			0.0175	CD83
	iberdomide		chemical drug			0.0175	IKZF1
	E-c-HDMAPP		chemical reagent			0.0175	BCL2A1
	palytoxin		chemical toxicant			0.0175	ABCB1
	satavaptan		chemical drug			0.0175	AVPR2
	acetoxyacetylaminofluorene		chemical toxicant			0.0175	ABCB1
	miltefosine		chemical drug			0.0175	ABCB1
	sulfonylurea		chemical drug			0.0175	HBA1/HBA2
	talniflumate		chemical drug			0.0175	GCNT3
	phenyl butyrate		chemical reagent			0.0175	CAMP
	AZD4573		chemical drug			0.0175	BCL2A1
	brimapitide		biologic drug			0.0175	CSF1R
	3,20-pregnanedione		chemical - endogenous mammalian			0.0175	ABCB1
	MRTFB	0.308	transcription regulator			0.0182	CAMP,CCL5,HLA-A,SH3D19,VCL
	Ciap		group			0.0187	CCL5,CXCL2
	RNF138	0	enzyme			0.0187	CCR7,PLK3
	TF	-0.495	transporter			0.0187	CCL5,NFKBIA
	CXCR2		G-protein coupled receptor			0.0187	CXCL2,ITGAL
	poly dA-dT		chemical reagent			0.0187	CCL5,NFKBIA
	L-buthionine (SR)-sulfoximine		chemical drug			0.0187	ABCB1,NFKBIA
	KIT	0.067	transmembrane receptor			0.0188	CSF2RB,PPP2R5A,PTPN6,SHC1
	BCL6	-0.136	transcription regulator			0.0194	ADCY9,BCL2A1,CCR7,CD79B,HADHA,SH3D19
	plumbagin		chemical toxicant			0.0202	BCL2A1,PTPN6
	calpain		complex			0.0202	CCL5,NFKBIA
	NfkB-RelA		complex			0.0202	CCL5,NFKBIA
	NODAL		growth factor			0.0202	CCL5,CCR7
	SLPI	0.812	other			0.0202	CCL5,NFKBIA
	BTRC	0.158	enzyme			0.0202	BCL2A1,DLG1
	MTA2	0.056	transcription regulator			0.0202	HBB,LYL1
	TRPV4	-0.211	ion channel			0.0202	CCL5,CXCL2
	EIF4EBP2	0.312	translation regulator			0.0202	CCL5,PNPLA2
	RHO	-0.338	G-protein coupled receptor			0.0213	ACADM,CSF1R,HCLS1
	leukotriene B4		chemical - endogenous mammalian			0.0218	CAMP,CXCL2
	resolvin E1		chemical - endogenous mammalian			0.0218	CAMP,CXCL2
	AHI1	-0.235	other			0.0218	HCK,LAPTM5
	IL36G		cytokine			0.0218	CD83,CXCL2
	cuprizone		chemical toxicant			0.0218	CCL5,MAG
	FLI1	-0.598	transcription regulator			0.0221	CCL5,CSF1R,HBB
	MMP12	-0.514	peptidase			0.0221	CCL5,NFKBIA,VCL
	KCNE3	0.242	ion channel			0.0221	CXCL13,KCNJ2,PLK3
	trovafloxacin		chemical drug			0.0221	CXCL2,HLA-A,NFKBIA
	ECSIT	0.022	transcription regulator			0.0234	CD83,NFKBIA
	ELOVL5	-0.029	enzyme			0.025	HADHA,PNPLA2
	ACE	0.149	peptidase			0.025	CCL5,IL9R
	SHC1	0.183	other			0.0256	CCR7,CXCL13,PLA2G2D
	MMP2	0.195	peptidase			0.0256	CCL5,CSF2RB,IL2RG
	MUC1		other			0.0256	CD83,HLA-DRA,NFKBIA
	Map3k7	0.18	kinase			0.0256	CCL5,CXCL2,NFKBIA
	KRAS	0.142	enzyme			0.0259	BCL2A1,BTC,CSF2RB,FBN1,GCNT3,HLA-DMB,LAMA2,LAMP3,LYL1,LYZ,NFKBIA,PTPN6,RAB27A
	L-ornithine		chemical - endogenous mammalian			0.0262	PNPLA2
	chloride		chemical - endogenous mammalian			0.0262	SLC26A4
	HS-243		chemical - kinase inhibitor			0.0262	CCL5
	mineralocorticoid		chemical drug			0.0262	SLC26A4
	Stat5b dimer		complex			0.0262	BCL2A1
	clobetasol		chemical drug			0.0262	CAMP
	DEFA1 (includes others)		other			0.0262	CD4
	FREM1	-0.357	other			0.0262	FREM2
	ADRM1	0.036	other			0.0262	NFKBIA
	LRRC8E	0.27	ion channel			0.0262	CCL5
	S1PR4	-0.826	G-protein coupled receptor			0.0262	CXCL2
	MTCH2	0.196	other			0.0262	SHC1
	OXGR1	0.303	G-protein coupled receptor			0.0262	PNPLA2
	FERMT3	-0.621	enzyme			0.0262	ITGAL
	KLHL21	0.091	other			0.0262	NFKBIA
	TRPC5		ion channel			0.0262	ABCB1
	GNLY		other			0.0262	CCL5
	RPL13A	0.052	other			0.0262	CXCL13
	DHPS	-0.018	enzyme			0.0262	CDK5R1
	YARS1	0.176	enzyme			0.0262	NFKBIA
	MADD	0.093	other			0.0262	RAB27A
	CARD8		other			0.0262	BCL2A1
	ZNRD1ASP		other			0.0262	HLA-A
	IFI30	-0.141	enzyme			0.0262	HLA-A
	TBC1D10A	-0.071	other			0.0262	RAB27A
	CACNA2D1	-0.064	ion channel			0.0262	CACNA1I
	ZFX	0.095	transcription regulator			0.0262	FZD6
	RECQL	0.218	enzyme			0.0262	HBB
	ERC1	0.139	other			0.0262	NFKBIA
	Cacnb1		ion channel			0.0262	CACNA1I
	CYP2C9	0.777	enzyme			0.0262	HBA1/HBA2
	HERC5		enzyme			0.0262	CCL5
	HILPDA	0.027	other			0.0262	PNPLA2
	prinaberel		chemical drug			0.0262	CXCL2
	fomepizole		chemical drug			0.0262	CCL5
	p-chloroamphetamine		chemical drug			0.0262	SMO
	oenothein B		chemical - endogenous non-mammalian			0.0262	CXCL2
	senexin B		chemical drug			0.0262	CXCL2
	KDM8	0.191	enzyme			0.0266	OGDH,PDHA1,PDHB
	TARDBP	0.104	transcription regulator			0.0266	C1QB,HLA-A,MAG
	mir-27		microRNA			0.0266	ABCB1,IKZF1,PNPLA2
	2-deoxyglucose		chemical drug			0.0266	ABCB1,CCL5,CSF1R
	ROCK1	-0.374	kinase			0.0267	FBN1,LAMA2
	hemozoin		chemical - endogenous non-mammalian			0.0267	CD83,CXCL2
	magnesium		chemical - endogenous mammalian			0.0267	CNNM2,MAG
	rituximab		biologic drug			0.0285	BCL2A1,CCL5
	BAK1	0.285	other			0.0285	CCL5,HLA-A
	BGN	0.356	other			0.0285	CXCL13,FBN1
	SFRP4	0.22	transmembrane receptor			0.0285	BTC,DVL3
	VAV3	0.092	cytokine			0.0285	BCL2A1,BTC
	CD69	-0.945	transmembrane receptor			0.0285	CCL5,CLCA1
	GNAI2	-0.094	enzyme			0.0285	CCR7,ITGAL
	MIF	-0.164	cytokine			0.0294	CD84,CXCL2,IL16,IL9R
	tetracycline		chemical drug			0.0295	HADHA,MAL,PTPN7
	CARD9	-0.344	other			0.0303	CCL5,CXCL2
	MALT1	-0.184	peptidase			0.0303	CD83,CXCL2
	IDR-1002		chemical reagent			0.0303	CCL5,CXCL2
	KRT17	-0.195	other			0.0303	CCL5,CXCL2
	CNR2	-0.709	G-protein coupled receptor			0.0303	CCR7,ITGAL
	VAV2	-0.232	transcription regulator			0.0303	BCL2A1,BTC
	fluvoxamine		chemical drug			0.0303	CCR7,IL27RA
	suramin		chemical drug			0.0303	CCL5,SHC1
	ursolic acid		chemical drug			0.0305	MAG,MAL,SLC6A9
	PRNP	-0.192	other			0.0315	ABCB1,CCL5,NFKBIA
	RELB	-0.096	transcription regulator			0.0315	ABCB1,CXCL13,NFKBIA
	ID3	-0.298	transcription regulator			0.0316	CCL5,CCR7,CD83,CSF2RB,IL9R
	TIRAP	-0.065	other			0.0321	CCL5,CXCL2
	SFTPA1		transporter			0.0325	CXCL2,GABRP,HBA1/HBA2
	KDM6B	0.211	enzyme			0.034	CCL5,ITGAL
	Cdk		group			0.034	CCL5,CXCL2
	TAB1	0.14	enzyme			0.034	CCL5,NFKBIA
	sodium tungstate		chemical drug			0.034	PDHA1,PDHB
	TAS4464		chemical drug			0.034	BCL2A1,ITGAL
	TCF12	0.049	transcription regulator			0.0345	CD4,CSF1R,HADHA,IL9R
	Rsk		group			0.0347	CXCL2
	chitinase		group			0.0347	CCL5
	aluminum hydroxide		chemical drug			0.0347	Glycam1
	smectite		chemical drug			0.0347	MUC2
	CACTIN	-0.093	other			0.0347	CCL5
	ZXDC	0.185	transcription regulator			0.0347	HLA-DRA
	IKBIP	-0.115	other			0.0347	CXCL2
	CIRBP	-0.057	translation regulator			0.0347	CXCL2
	TRIL	-0.045	other			0.0347	CCL5
	NXF1	-0.187	other			0.0347	ITGAL
	FZD1	0.3	G-protein coupled receptor			0.0347	ABCB1
	UFD1	0.023	peptidase			0.0347	CCL5
	miR-27a-5p (miRNAs w/seed GGGCUUA)		mature microRNA			0.0347	CX3CR1
	miR-330-5p (and other miRNAs w/seed CUCUGGG)		mature microRNA			0.0347	SMO
	miR-324-5p (miRNAs w/seed GCAUCCC)		mature microRNA			0.0347	SMO
	PALS1	-0.021	kinase			0.0347	MAG
	CBFA2T2	0.13	transcription regulator			0.0347	MUC2
	SNX17	0.022	transporter			0.0347	ITGAL
	K-604		chemical drug			0.0347	CCL5
	IK	0.025	cytokine			0.0347	HLA-DRA
	IGL		other			0.0347	IL2RG
	TAF12	-0.121	transcription regulator			0.0347	HLA-DRA
	NPLOC4	0.144	other			0.0347	CCL5
	DCC		transmembrane receptor			0.0347	MAG
	Macf1	-0.118	enzyme			0.0347	VCL
	GGT1	-0.042	enzyme			0.0347	CLCA1
	PTP4A2	-0.1	phosphatase			0.0347	VCL
	WARS1	0.213	enzyme			0.0347	NFKBIA
	ERO1A	0.149	enzyme			0.0347	CXCL2
	Gzmb		peptidase			0.0347	Gzmc
	Cyp2a12/Cyp2a22	-0.332	enzyme			0.0347	ABCB1
	phenylacetic acid		chemical - endogenous mammalian			0.0347	HLA-A
	apicularen A		chemical reagent			0.0347	NFKBIA
	ascomycin		chemical reagent			0.0347	CD83
	polymethyl methacrylate		chemical reagent			0.0347	CSF1R
	phenanthridine		chemical toxicant			0.0347	CD83
	salsalate		chemical drug			0.0347	NFKBIA
	1,1-diethyl-2-hydroxy-2-nitrosohydrazine		chemical toxicant			0.0347	NFKBIA
	AC083837.1		other			0.0347	CCL5
	succinylacetone		chemical - endogenous mammalian			0.0347	HBB
	fenclonine		chemical drug			0.0347	SMO
	D,L-propargylglycine		chemical reagent			0.0347	CX3CR1
	Firre	0.169	other			0.0357	ARHGAP45,CARMIL2,LYL1
	TGFA	0.271	growth factor			0.0357	CCL5,CXCL2,MUC2
	C3	-0.354	peptidase			0.0357	BCL2A1,CCL5,CXCL2
	etanercept		biologic drug			0.0359	CD83,CXCL13
	Secretase gamma		complex			0.0359	CD83,MUC2
	bryostatin 1		chemical drug			0.0359	CCL5,IL2RG
	ELAVL1	-0.016	other			0.0364	CD83,HBB,HLA-A,HLA-DRB5,NFKBIA
	GCG		other			0.0369	ACADM,PDHA1,PLK3
	CpG ODN 1826		chemical reagent			0.0369	CCL5,CCR7,CD83
	ITGAM	-0.367	transmembrane receptor			0.0379	BCL2A1,CCL5
	deoxycorticosterone acetate/potassium chloride/sodium chloride		chemical reagent			0.0379	CCL5,CXCL2
	ACE2	0.308	peptidase			0.0379	CCL5,CXCL2
	PD173074		chemical reagent			0.038	CCR7,GABRP,LCP1
	FOXL2		transcription regulator			0.0391	AVPR2,BCL2A1,CXCL2
	CYBB	-0.623	enzyme			0.0399	CAMP,CCL5
	CORT	-0.299	other			0.0399	CCL5,CCR7
	HDAC5	0.058	transcription regulator			0.0403	ACADM,HLA-DRA,MAG
	IFNL1		cytokine			0.0403	CCR7,CD83,LAMP3
	POU2AF1	-0.979	transcription regulator			0.0403	CD79B,CD83,HLA-DRA
	LYN	-0.218	kinase			0.0403	BCL2A1,CCL5,NFKBIA
	IL7R	-0.462	transmembrane receptor			0.0415	CCR7,SKAP1,ZNF750
	RNASE2	-0.498	enzyme			0.0419	CCL5,CD83
	IKZF2	-0.032	transcription regulator			0.0419	Cd52,Gzmc
	GNB2	0.074	enzyme			0.0419	CD83,CNNM2
	GTF2B	0.078	transcription regulator			0.0419	BCL2A1,NFKBIA
	ozone		chemical toxicant			0.0419	CXCL2,SLC26A4
	KLF6	-0.105	transcription regulator			0.0427	ACADM,CXCL2,NFKBIA
	NSC 172285		chemical reagent			0.0432	HCK
	p38 Sapk		group			0.0432	CD83
	teniposide		chemical drug			0.0432	CCL5
	asialo GM1 ganglioside		chemical - endogenous mammalian			0.0432	MUC2
	Integrinα		group			0.0432	ITGAL
	edratide		biologic drug			0.0432	ITGAL
	CpG ODN 1555		chemical reagent			0.0432	TNFRSF13B
	IRF3-IRF7		complex			0.0432	CCL5
	MARCHF3	-0.054	other			0.0432	NFKBIA
	propolis		biologic drug			0.0432	CCL5
	YIPF6	0.364	other			0.0432	PNPLA2
	MCOLN2	0.302	ion channel			0.0432	CCL5
	RPE65		enzyme			0.0432	RDH12
	GPR68	-0.22	G-protein coupled receptor			0.0432	CCR7
	TAF9	0.057	transcription regulator			0.0432	HLA-DRA
	Nc2		complex			0.0432	HLA-A
	Mucin		group			0.0432	CD83
	RAP1B	-0.008	enzyme			0.0432	CCL5
	DAPK1	-0.061	kinase			0.0432	CCR7
	UBB		enzyme			0.0432	NFKBIA
	PGRMC1	-0.052	transmembrane receptor			0.0432	BCL2A1
	TLN1	0.084	other			0.0432	ITGAL
	TIAL1	-0.034	transcription regulator			0.0432	HBB
	NBR1	0.192	other			0.0432	HCLS1
	SEPTIN9	0.141	enzyme			0.0432	ARHGAP4
	RPS3	0.079	enzyme			0.0432	NFKBIA
	CCL22	-1.028	cytokine			0.0432	CXCL2
	GJB1	0.053	transporter			0.0432	DLG1
	SLAMF6	-0.839	transmembrane receptor			0.0432	IL16
	ADAM8	-0.468	peptidase			0.0432	CCL5
	AQP3	-0.054	transporter			0.0432	CCL5
	NUBPL	0.335	other			0.0432	NDUFS1
	ORC2	-0.031	other			0.0432	HBB
	PELI2	0.304	enzyme			0.0432	CXCL2
	SSBP1	-0.105	other			0.0432	HLA-DRA
	Muc1	0.576	transmembrane receptor			0.0432	CXCL2
	PILRA	-0.705	other			0.0432	CXCL2
	RAB4A	0.143	enzyme			0.0432	CD4
	fluticasone		chemical drug			0.0432	CCL5
	H3B-8800		chemical drug			0.0432	CCL5
	ranitidine		chemical drug			0.0432	CXCL2
	fenoldopam		chemical drug			0.0432	PPP2R5A
	roflumilast		chemical drug			0.0432	CXCL2
	cathelicidin-WA		chemical - endogenous mammalian			0.0432	MUC2
	N(1)-guanyl-1,7-diaminoheptane		chemical reagent			0.0432	CD83
	trans-aminocyclopentane-1,3-dicarboxylic acid		chemical reagent			0.0432	MAG
	halofuginol		chemical reagent			0.0432	CCL5
	lactose		chemical - endogenous mammalian			0.0432	CAMP
	lovastatin		chemical drug			0.0437	CCL5,HBA1/HBA2,MAG,MAL
	CBFB	0.078	transcription regulator			0.0439	CD4,CSF1R,ITGAL
	LCN2	-0.447	transporter			0.0439	CCL5,CXCL13,CXCL2
	NCOA3	0.004	transcription regulator			0.0439	LAMP3,MUC2,NFKBIA
	TCL1A		transcription regulator			0.0439	C1QB,CAMP,FABP7
	MBTD1	-0.095	other			0.044	HBA1/HBA2,NFKBIA
	CERK	-0.147	kinase			0.044	CCL5,CXCL2
	NEUROG2		transcription regulator			0.044	CDK5R1,IKZF1
	TLR5	0.388	transmembrane receptor			0.044	CCL5,CXCL2
	IGHM	-0.958	transmembrane receptor			0.044	CCL5,CXCL13
	ethylene glycol tetraacetic acid		chemical reagent			0.044	CD83,KCNJ2
	BRD4		kinase			0.0446	CD4,CXCL2,FBN1,MAL
	SERPINE2	-0.436	other			0.0461	CCL5,CXCL13
	GNB1	0.052	enzyme			0.0461	CD83,CNNM2
	CIDEC	0.336	other			0.0461	ACADM,PNPLA2
	MAP3K8	-0.423	kinase			0.0473	CDK5R1,CXCL2,GAB1,IER5
	EIF4EBP1	0.063	translation regulator			0.0482	CCL5,PNPLA2
	parthenolide		chemical drug			0.0482	CCL5,CXCL2
	ID2	-0.361	transcription regulator			0.0483	CCL5,CCR7,CD83,CSF2RB,IL9R

## Sheet: GO Terms
	Supplementary Table S4. Enriched cell types as identifed using significantly DEGs with an absolute log2 fold change greater than 1.
	term	p-value	q-value
	cellular response to organic substance (GO:0071310)	3.76927e-05	0.0338934
	positive regulation of cell-cell adhesion mediated by integrin (GO:0033634)	4.41607e-05	0.0338934
	positive regulation of cell adhesion mediated by integrin (GO:0033630)	7.8488e-05	0.0401597
	cortical actin cytoskeleton organization (GO:0030866)	0.000121716	0.0467086
	regulation of cell-cell adhesion mediated by integrin (GO:0033632)	0.000254773	0.076418
	positive regulation of protein polymerization (GO:0032273)	0.000298702	0.076418
	positive regulation of actin filament polymerization (GO:0030838)	0.000457842	0.0875429
	positive regulation of T cell activation (GO:0050870)	0.000469774	0.0875429
	cellular response to interleukin-15 (GO:0071350)	0.000589642	0.0875429
	interleukin-15-mediated signaling pathway (GO:0035723)	0.000589642	0.0875429
	cytokine-mediated signaling pathway (GO:0019221)	0.000627343	0.0875429
	cellular response to cytokine stimulus (GO:0071345)	0.000714428	0.0913873
	antigen receptor-mediated signaling pathway (GO:0050851)	0.000811245	0.0957893
	positive regulation of supramolecular fiber organization (GO:1902905)	0.00130536	0.13797
	regulation of metal ion transport (GO:0010959)	0.00134824	0.13797
	regulation of barbed-end actin filament capping (GO:2000812)	0.00169081	0.148431
	succinyl-CoA metabolic process (GO:0006104)	0.00169081	0.148431
	positive regulation of T cell proliferation (GO:0042102)	0.00178923	0.148431
	cortical cytoskeleton organization (GO:0030865)	0.0020474	0.148431
	lipopolysaccharide-mediated signaling pathway (GO:0031663)	0.00219518	0.148431
	peptide antigen assembly with MHC protein complex (GO:0002501)	0.00251414	0.148431
	cellular response to cold (GO:0070417)	0.00251414	0.148431
	regulation of endoplasmic reticulum tubular network organization (GO:1903371)	0.00251414	0.148431
	cell junction disassembly (GO:0150146)	0.00251414	0.148431
	negative regulation of myeloid leukocyte mediated immunity (GO:0002887)	0.00251414	0.148431
	acetyl-CoA biosynthetic process from pyruvate (GO:0006086)	0.00251414	0.148431
	regulation of actin filament polymerization (GO:0030833)	0.00279118	0.158684
	positive regulation of immune response (GO:0050778)	0.00313977	0.1623
	regulation of T cell proliferation (GO:0042129)	0.00332536	0.1623
	regulation of natural killer cell chemotaxis (GO:2000501)	0.00348919	0.1623
	oxygen transport (GO:0015671)	0.00348919	0.1623
	positive regulation of cAMP-mediated signaling (GO:0043950)	0.00348919	0.1623
	Golgi disassembly (GO:0090166)	0.00348919	0.1623
	response to cytokine (GO:0034097)	0.00383251	0.173027
	positive regulation of cytoskeleton organization (GO:0051495)	0.00460817	0.191329
	positive regulation of CD4-positive, alpha-beta T cell differentiation (GO:0043372)	0.00461185	0.191329
	immunological synapse formation (GO:0001771)	0.00461185	0.191329
	positive regulation of plasma membrane bounded cell projection assembly (GO:0120034)	0.00485185	0.195989
	cellular response to lipopolysaccharide (GO:0071222)	0.00521754	0.196149
	negative regulation of apoptotic process (GO:0043066)	0.00531339	0.196149
	regulation of humoral immune response (GO:0002920)	0.00559487	0.196149
	negative regulation of leukocyte degranulation (GO:0043301)	0.00587807	0.196149
	cellular response to interleukin-9 (GO:0071355)	0.00587807	0.196149
	positive regulation of CD8-positive, alpha-beta T cell activation (GO:2001187)	0.00587807	0.196149
	interleukin-9-mediated signaling pathway (GO:0038113)	0.00587807	0.196149
	synapse pruning (GO:0098883)	0.00587807	0.196149
	regulation of inflammatory response (GO:0050727)	0.00619029	0.202172
	positive regulation of phosphate metabolic process (GO:0045937)	0.0070951	0.215015
	regulation of calcium ion transport (GO:0051924)	0.00720502	0.215015
	acetyl-CoA biosynthetic process (GO:0006085)	0.0072839	0.215015
	B cell homeostasis (GO:0001782)	0.0072839	0.215015
	regulation of podosome assembly (GO:0071801)	0.0072839	0.215015
	ERBB2 signaling pathway (GO:0038128)	0.008502	0.233564
	positive regulation of integrin activation (GO:0033625)	0.00882546	0.233564
	Golgi inheritance (GO:0048313)	0.00882546	0.233564
	interleukin-2-mediated signaling pathway (GO:0038110)	0.00882546	0.233564
	actin filament network formation (GO:0051639)	0.00882546	0.233564
	cellular response to interleukin-2 (GO:0071352)	0.00882546	0.233564
	positive regulation of organelle organization (GO:0010638)	0.00926236	0.233564
	regulation of immune response (GO:0050776)	0.00982454	0.233564
	B cell receptor signaling pathway (GO:0050853)	0.0100612	0.233564
	positive regulation of interleukin-12 production (GO:0032735)	0.0100612	0.233564
	antimicrobial humoral immune response mediated by antimicrobial peptide (GO:0061844)	0.0101493	0.233564
	lysine catabolic process (GO:0006554)	0.010499	0.233564
	regulation of CD4-positive, alpha-beta T cell differentiation (GO:0043370)	0.010499	0.233564
	negative regulation of leukocyte apoptotic process (GO:2000107)	0.010499	0.233564
	positive regulation of actin filament depolymerization (GO:0030836)	0.010499	0.233564
	gas transport (GO:0015669)	0.010499	0.233564
	lysine metabolic process (GO:0006553)	0.010499	0.233564
	inflammatory response (GO:0006954)	0.0116138	0.254675
	antigen processing and presentation of exogenous peptide antigen (GO:0002478)	0.0118428	0.255155
	purine ribonucleoside triphosphate metabolic process (GO:0009205)	0.0123007	0.255155
	positive regulation of CD4-positive, alpha-beta T cell activation (GO:2000516)	0.0123007	0.255155
	Golgi ribbon formation (GO:0090161)	0.0123007	0.255155
	interferon-gamma-mediated signaling pathway (GO:0060333)	0.0124898	0.255624
	regulation of actin cytoskeleton reorganization (GO:2000249)	0.0126919	0.256344
	neutrophil chemotaxis (GO:0030593)	0.013779	0.256921
	defense response to Gram-positive bacterium (GO:0050830)	0.013779	0.256921
	regulation of ERK1 and ERK2 cascade (GO:0070372)	0.01403	0.256921
	positive regulation of T cell chemotaxis (GO:0010820)	0.0142269	0.256921
	positive regulation of macrophage chemotaxis (GO:0010759)	0.0142269	0.256921
	positive regulation of glycoprotein biosynthetic process (GO:0010560)	0.0142269	0.256921
	cell junction maintenance (GO:0034331)	0.0142269	0.256921
	antigen processing and presentation of endogenous peptide antigen (GO:0002483)	0.0142269	0.256921
	2-oxoglutarate metabolic process (GO:0006103)	0.0142269	0.256921
	granulocyte chemotaxis (GO:0071621)	0.0158661	0.274514
	regulation of integrin activation (GO:0033623)	0.0162741	0.274514
	regulation of lymphocyte activation (GO:0051249)	0.0162741	0.274514
	regulation of T cell chemotaxis (GO:0010819)	0.0162741	0.274514
	GTP metabolic process (GO:0046039)	0.0162741	0.274514
	macrophage differentiation (GO:0030225)	0.0162741	0.274514
	positive regulation of lymphocyte proliferation (GO:0050671)	0.017362	0.289682
	epiboly involved in wound healing (GO:0090505)	0.0184389	0.292106
	positive regulation of alpha-beta T cell proliferation (GO:0046641)	0.0184389	0.292106
	dendritic cell chemotaxis (GO:0002407)	0.0184389	0.292106
	T cell receptor signaling pathway (GO:0050852)	0.018611	0.292106
	cytosolic transport (GO:0016482)	0.0189292	0.292106
	neutrophil migration (GO:1990266)	0.0189431	0.292106
	positive regulation of phosphatidylinositol 3-kinase signaling (GO:0014068)	0.0189431	0.292106
	positive regulation of leukocyte mediated cytotoxicity (GO:0001912)	0.0190297	0.292106
	MAPK cascade (GO:0000165)	0.0196874	0.29921
	antibacterial humoral response (GO:0019731)	0.0202274	0.304403
	ruffle organization (GO:0031529)	0.0207176	0.305784
	positive regulation of regulated secretory pathway (GO:1903307)	0.0207176	0.305784
	negative regulation of T cell activation (GO:0050868)	0.0214658	0.311134
	protein homooligomerization (GO:0051260)	0.0222653	0.311134
	cellular response to interferon-gamma (GO:0071346)	0.0222653	0.311134
	erythrocyte differentiation (GO:0030218)	0.0227448	0.311134
	positive regulation of organelle assembly (GO:1902117)	0.0227448	0.311134
	dendritic cell migration (GO:0036336)	0.023107	0.311134
	phosphatidylglycerol acyl-chain remodeling (GO:0036148)	0.023107	0.311134
	epithelial structure maintenance (GO:0010669)	0.023107	0.311134
	positive regulation of lymphocyte chemotaxis (GO:0140131)	0.023107	0.311134
	maintenance of gastrointestinal epithelium (GO:0030277)	0.023107	0.311134
	epidermal growth factor receptor signaling pathway (GO:0007173)	0.0240644	0.315717
	positive regulation of cell-cell adhesion (GO:0022409)	0.0240644	0.315717
	regulation of T cell activation (GO:0050863)	0.0240644	0.315717
	lymphocyte differentiation (GO:0030098)	0.0251644	0.319528
	regulation of interleukin-2 production (GO:0032663)	0.0254246	0.319528
	aspartate family amino acid catabolic process (GO:0009068)	0.0256039	0.319528
	positive regulation of actin cytoskeleton reorganization (GO:2000251)	0.0256039	0.319528
	positive regulation of macrophage migration (GO:1905523)	0.0256039	0.319528
	positive regulation of neutrophil chemotaxis (GO:0090023)	0.0256039	0.319528
	positive regulation of ERK1 and ERK2 cascade (GO:0070374)	0.0268752	0.332689
	negative regulation of lipid storage (GO:0010888)	0.0282048	0.335616
	negative regulation of osteoclast differentiation (GO:0045671)	0.0282048	0.335616
	regulation of granulocyte chemotaxis (GO:0071622)	0.0282048	0.335616
	positive regulation of alpha-beta T cell activation (GO:0046635)	0.0282048	0.335616
	mesoderm development (GO:0007498)	0.0282048	0.335616
	defense response to bacterium (GO:0042742)	0.0296206	0.348316
	regulation of interleukin-12 production (GO:0032655)	0.0297485	0.348316
	positive regulation of intracellular signal transduction (GO:1902533)	0.0299529	0.348316
	negative regulation of programmed cell death (GO:0043069)	0.0305419	0.348838
	negative regulation of protein localization to cell periphery (GO:1904376)	0.0309068	0.348838
	negative regulation of protein localization to plasma membrane (GO:1903077)	0.0309068	0.348838
	hydrogen peroxide catabolic process (GO:0042744)	0.0309068	0.348838
	regulation of immune effector process (GO:0002697)	0.0328328	0.357147
	positive regulation of phagocytosis (GO:0050766)	0.0328328	0.357147
	T cell activation (GO:0042110)	0.0336211	0.357147
	positive regulation of neutrophil migration (GO:1902624)	0.0337066	0.357147
	positive regulation of granulocyte chemotaxis (GO:0071624)	0.0337066	0.357147
	regulation of macrophage chemotaxis (GO:0010758)	0.0337066	0.357147
	cell projection assembly (GO:0030031)	0.0337066	0.357147
	negative regulation of B cell activation (GO:0050869)	0.0337066	0.357147
	negative regulation of cytokine production (GO:0001818)	0.0340739	0.357147
	cytoplasmic microtubule organization (GO:0031122)	0.034435	0.357147
	positive regulation of leukocyte chemotaxis (GO:0002690)	0.034435	0.357147
	inorganic anion transport (GO:0015698)	0.034435	0.357147
	regulation of inflammatory response to antigenic stimulus (GO:0002861)	0.0354131	0.364826
	negative regulation of phosphoprotein phosphatase activity (GO:0032515)	0.0366014	0.369626
	regulation of mononuclear cell migration (GO:0071675)	0.0366014	0.369626
	triglyceride catabolic process (GO:0019433)	0.0366014	0.369626
	peptidyl-tyrosine modification (GO:0018212)	0.0377588	0.376362
	chemokine-mediated signaling pathway (GO:0070098)	0.0377588	0.376362
	enzyme linked receptor protein signaling pathway (GO:0007167)	0.0383147	0.379439
	positive regulation of lamellipodium assembly (GO:0010592)	0.039588	0.384605
	wound healing, spreading of cells (GO:0044319)	0.039588	0.384605
	protein kinase B signaling (GO:0043491)	0.039588	0.384605
	antigen processing and presentation of exogenous peptide antigen via MHC class II (GO:0019886)	0.0409263	0.385142
	positive regulation of defense response (GO:0031349)	0.0409263	0.385142
	regulation of phagocytosis (GO:0050764)	0.0412405	0.385142
	positive regulation of T cell migration (GO:2000406)	0.0426635	0.385142
	regulation of neutrophil chemotaxis (GO:0090022)	0.0426635	0.385142
	phosphatidylglycerol metabolic process (GO:0046471)	0.0426635	0.385142
	negative regulation of antigen receptor-mediated signaling pathway (GO:0050858)	0.0426635	0.385142
	regulation of cAMP-mediated signaling (GO:0043949)	0.0426635	0.385142
	transmembrane receptor protein tyrosine kinase signaling pathway (GO:0007169)	0.0427257	0.385142
	response to reactive oxygen species (GO:0000302)	0.04304	0.385142
	positive regulation of tyrosine phosphorylation of STAT protein (GO:0042531)	0.04304	0.385142
	antigen processing and presentation of peptide antigen via MHC class II (GO:0002495)	0.0435459	0.385142
	cellular response to chemokine (GO:1990869)	0.0448782	0.385142
	positive regulation of cytosolic calcium ion concentration (GO:0007204)	0.0456365	0.385142
	positive regulation of interleukin-2 production (GO:0032743)	0.0458253	0.385142
	mononuclear cell differentiation (GO:1903131)	0.0458253	0.385142
	positive regulation of T cell mediated cytotoxicity (GO:0001916)	0.0458253	0.385142
	membrane depolarization during action potential (GO:0086010)	0.0458253	0.385142
	positive regulation of microtubule polymerization or depolymerization (GO:0031112)	0.0458253	0.385142
	positive regulation of filopodium assembly (GO:0051491)	0.0458253	0.385142
	negative regulation of protein localization to membrane (GO:1905476)	0.0458253	0.385142
	negative regulation of interleukin-1 beta production (GO:0032691)	0.0458253	0.385142
	positive regulation of ion transmembrane transporter activity (GO:0032414)	0.0458253	0.385142
	O-glycan processing (GO:0016266)	0.0467549	0.385142
	entrainment of circadian clock by photoperiod (GO:0043153)	0.0490703	0.385142
	regulation of epidermal growth factor-activated receptor activity (GO:0007176)	0.0490703	0.385142
	positive regulation of cellular component movement (GO:0051272)	0.0490703	0.385142
